# Supplementary material for: RNA metabolism is the primary target of formamide in vivo
Source: Springer Nature journal article supplement (doi:10.1038/s41598-017-16291-8), 2017-11-15
Supplement: MOESM2 [file 41598_2017_16291_MOESM2_ESM.xlsx]

## Sheet: Sheet1
Systematic name	Rep. 1			Rep. 2
	Control	Experiment	Ratio	Control	Experiment	Ratio
SPAC1002.01	0.943843	1.02355	1.08445	0.99976	0.949016	0.949244
SPAC1002.02	1.01913	0.999537	0.980778	1.02006	0.972868	0.953732
SPAC1002.03c	1.09676	1.09263	0.996233	1.05064	0.99091	0.943144
SPAC1002.05c	1.09776	1.07153	0.976106	1.03728	0.95671	0.922329
SPAC1002.06c	1.04024	0.999907	0.961226	0.977026	0.975911	0.998859
SPAC1002.07c	0.986632	0.975664	0.988883	0.939348	0.909137	0.967839
SPAC1002.12c	1.03229	0.957342	0.927398	1.05131	0.987068	0.938894
SPAC1002.14	0.890403	1.00981	1.1341	0.941254	0.980589	1.04179
SPAC1002.17c	0.992116	0.923661	0.931	1.03324	0.934832	0.904761
SPAC1002.18	0.995681	0.967151	0.971346	1.06157	0.946158	0.891281
SPAC1002.19	1.29252	1.3979	1.08153	1.24827	1.34305	1.07593
SPAC1002.20	1.77894	1.66621	0.936633	1.72386	1.54059	0.893688
SPAC1006.01	1.01092	1.02885	1.01774	0.944177	1.03428	1.09543
SPAC1006.03c	0.952829	0.830897	0.872032	0.820226	0.900729	1.09815
SPAC1006.04c	0.960278	0.91312	0.950891	0.854198	0.845208	0.989476
SPAC1006.05c	0	0	#DIV/0!	0	0	#DIV/0!
SPAC1006.06	1.15328	0.905059	0.784772	1.16534	1.13505	0.974009
SPAC1006.09	1.17199	0.803125	0.685266	1.19862	1.04584	0.872543
SPAC1039.01	1.02989	0.92651	0.899618	0.987511	0.966859	0.979087
SPAC1039.02	0.884623	1.05857	1.19664	1.09037	1.01395	0.929914
SPAC1039.03	1.08185	0.849952	0.785644	1.05608	1.20449	1.14052
SPAC1039.04	1.27644	1.38634	1.0861	1.17887	1.35321	1.14788
SPAC1039.05c	1.09155	0.864332	0.79184	1.13932	1.10489	0.969786
SPAC1039.06	0.890556	0.992469	1.11444	0.890336	0.881456	0.990026
SPAC1039.07c	1.24627	0.848975	0.681215	0.998321	0.744518	0.74577
SPAC1039.08	0.965056	0.806791	0.836004	0.878574	0.78365	0.891957
SPAC1039.09	1.03907	0.855209	0.82305	0.996692	0.889852	0.892805
SPAC1039.10	1.05392	1.01578	0.963815	1.07433	1.0079	0.938164
SPAC105.01c	1.21522	1.08932	0.896399	0.979004	0.97331	0.994185
SPAC105.02c	1.05569	1.01164	0.958269	1.03972	0.990799	0.952945
SPAC105.03c	1.34747	1.02329	0.759419	1.08113	1.16308	1.0758
SPAC1071.02	0.59024	0.62431	1.05772	0.873617	0.364568	0.417308
SPAC1071.03c	1.0102	0.985983	0.976029	0.943618	1.01887	1.07975
SPAC1071.04c	0.814786	0.501051	0.614947	0.708464	0.679029	0.958452
SPAC1071.05	1.13921	0.877031	0.769862	1.04947	1.08108	1.03012
SPAC1071.06	1.41941	1.67761	1.18191	1.36755	1.36617	0.998993
SPAC1071.07c	0.694355	0.752026	1.08306	0.87469	0.883778	1.01039
SPAC1071.08	0.829833	0.874287	1.05357	0.755805	0.777124	1.02821
SPAC1071.09c	0.943717	0.96345	1.02091	0.986981	0.855042	0.86632
SPAC1071.11	0.910263	1.09799	1.20624	0.975341	1.20345	1.23387
SPAC1071.12c	1.04955	1.03762	0.988635	1.01866	1.00269	0.984322
SPAC1093.01	0	0	#DIV/0!	0	0	#DIV/0!
SPAC1093.02	1.08301	0.614847	0.567723	1.04183	1.12663	1.0814
SPAC1093.03	0.817748	1.04874	1.28247	0.91475	0.915179	1.00047
SPAC1093.06c	0.663926	0.981084	1.4777	1.13947	1.12652	0.98863
SPAC10F6.04	0.945819	1.04046	1.10006	0.914758	0.955235	1.04425
SPAC10F6.05c	0.829917	1.10854	1.33572	0.924031	1.03491	1.11999
SPAC10F6.06	0.883492	0.716264	0.81072	0.896837	1.0607	1.18271
SPAC10F6.07c	1.25555	1.15813	0.922403	1.09492	1.07559	0.982339
SPAC10F6.08c	0.978376	0.847024	0.865745	0.893881	0.841117	0.940972
SPAC10F6.11c	1.16118	1.00997	0.869779	1.03712	1.03717	1.00005
SPAC10F6.12c	1.0272	1.16293	1.13214	1.01847	0.990643	0.972675
SPAC10F6.13c	0.464238	0.820166	1.76669	0.587581	0.669386	1.13922
SPAC10F6.14c	1.05373	0.91027	0.863858	0.950613	1.03843	1.09238
SPAC10F6.15	0.859121	1.17942	1.37282	0.918364	1.03187	1.12359
SPAC10F6.16	0.608176	0.508643	0.836343	0.862085	0.733877	0.851282
SPAC10F6.17c	0.824106	1.0941	1.32762	0.954693	0.972441	1.01859
SPAC110.02	1.00755	0.702453	0.697189	0.965719	0.629441	0.651784
SPAC1142.01	1.3428	1.30255	0.970027	1.16663	1.57164	1.34717
SPAC1142.02c	1.24649	1.35011	1.08313	1.2962	1.487	1.1472
SPAC1142.03c	1.38435	0.695448	0.502364	1.04987	0.906677	0.863611
SPAC1142.05	0	0	#DIV/0!	0	0	#DIV/0!
SPAC1142.06	1.02859	0.902748	0.877659	1.0435	0.899163	0.861682
SPAC1142.07c	0.744224	0.633293	0.850944	0.850207	0.579664	0.681791
SPAC1142.08	1.73485	1.29967	0.749152	1.37837	1.4154	1.02687
SPAC11D3.01c	0.962599	0.799139	0.830189	0.921457	0.996662	1.08162
SPAC11D3.02c	0.978569	1.00128	1.0232	1.02994	1.06294	1.03204
SPAC11D3.03c	0.951395	1.0397	1.09281	1.00613	1.02646	1.02021
SPAC11D3.04c	1.0019	0.975307	0.973457	0.953059	1.00726	1.05687
SPAC11D3.05	0.878042	0.883131	1.0058	0.998009	1.01462	1.01665
SPAC11D3.06	1.08397	1.05973	0.977637	1.01834	1.02907	1.01053
SPAC11D3.07c	1.17076	0.995927	0.850664	1.47374	1.47439	1.00044
SPAC11D3.09	1.24636	1.40841	1.13002	1.361	1.59527	1.17214
SPAC11D3.10	0.843521	0.85194	1.00998	0.899	0.963708	1.07198
SPAC11D3.13	0.977918	1.1452	1.17106	1.00984	1.03157	1.02152
SPAC11D3.14c	1.08123	0.968735	0.895955	1.01557	1.10629	1.08933
SPAC11D3.15	1.01502	0.963335	0.949084	0.997442	0.953017	0.955461
SPAC11D3.16c	0.978023	0.953451	0.974876	0.978784	1.04226	1.06485
SPAC11D3.17	1.18556	1.16735	0.984635	1.19978	1.36552	1.13814
SPAC11D3.18c	1.23518	1.30763	1.05865	1.19947	1.28813	1.07391
SPAC11E3.01c	1.06554	0.882795	0.828495	0.957145	0.812595	0.848978
SPAC11E3.03	0.985918	0.82697	0.838782	0.91082	0.720277	0.790801
SPAC11E3.04c	1.11775	0.948232	0.848341	0.96602	0.928948	0.961624
SPAC11E3.05	0.959323	0.840108	0.875731	0.988565	1.03005	1.04196
SPAC11E3.06	1.54308	1.48158	0.960144	1.66448	1.47439	0.885795
SPAC11E3.08c	1.08093	0.804078	0.743878	0.91505	0.879313	0.960945
SPAC11E3.09	0.789777	1.25188	1.5851	1.26336	1.3602	1.07665
SPAC11E3.10	1.59136	1.50294	0.944438	1.4192	1.44898	1.02098
SPAC11E3.11c	0.981938	0.683363	0.695933	0.834589	0.779723	0.934259
SPAC11E3.12	1.63007	1.53824	0.943663	1.32258	1.48786	1.12497
SPAC11E3.13c	1.0896	1.01397	0.930591	1.03109	1.00583	0.975502
SPAC11E3.14	0.955964	0.937179	0.98035	1.05379	1.00261	0.951432
SPAC11G7.01	1	0.874164	0.874164	0.960457	0.91144	0.948965
SPAC11G7.02	0.82236	0.57598	0.700398	0.775284	0.655918	0.846035
SPAC11G7.03	0.840009	0.904241	1.07647	0.979502	1.0646	1.08688
SPAC11G7.04	0.576129	0.241325	0.418873	0.538674	0.226016	0.419579
SPAC11G7.06c	1.04969	1.44397	1.37562	1.01851	0.958065	0.940656
SPAC11H11.01	0.962599	0.900367	0.93535	0.979687	0.917678	0.936705
SPAC11H11.02c	0.932452	1.12814	1.20986	1.00855	0.997076	0.988626
SPAC11H11.03c	1.27364	1.31029	1.02877	1.23034	1.52898	1.24273
SPAC11H11.04	1.07092	1.06326	0.992849	1.09319	1.07189	0.980515
SPAC11H11.05c	1.21037	1.27054	1.04971	1.17918	1.21524	1.03058
SPAC1250.02	1.36022	1.22796	0.902764	1.26136	1.29713	1.02835
SPAC1250.03	0.927382	1.03316	1.11406	0.953807	0.922889	0.967585
SPAC1250.05	0.992303	1.07593	1.08428	1.01605	0.963392	0.948172
SPAC1296.01c	1.09536	1.25104	1.14212	1.15351	1.36631	1.18448
SPAC1296.02	1.20634	1.14641	0.950323	1.07411	1.2026	1.11963
SPAC1296.03c	1.02119	0.95317	0.933389	0.960156	0.967874	1.00804
SPAC1296.04	1.5241	1.32374	0.868538	1.19978	1.23862	1.03237
SPAC1296.05c	1.0172	1.09979	1.0812	1.00572	1.03379	1.02791
SPAC1296.06	0	0	#DIV/0!	0	0	#DIV/0!
SPAC12B10.01c	1.21828	1.35585	1.11292	1.18644	1.51861	1.27998
SPAC12B10.02c	0	0	#DIV/0!	0	0	#DIV/0!
SPAC12B10.03	1.21032	1.04203	0.860958	1.15546	1.23466	1.06854
SPAC12B10.04	0.979087	0.906664	0.92603	0.679568	1.04661	1.54011
SPAC12B10.05	1.04577	1.0674	1.02068	0.967773	0.972278	1.00466
SPAC12B10.06c	0	0	#DIV/0!	0	0	#DIV/0!
SPAC12B10.07	0.993349	0.908136	0.914217	1.07402	1.10243	1.02645
SPAC12B10.09	1.12607	1.24265	1.10352	1.17625	0.941958	0.800814
SPAC12B10.10	0.9227	1.13012	1.2248	0.898676	1.06447	1.18449
SPAC12B10.11	1.08837	1.04229	0.957662	1.0265	1.06111	1.03372
SPAC12B10.12c	1.06743	0.543759	0.509409	1.21908	0.955134	0.783488
SPAC12B10.13	1.0079	1.01707	1.0091	1.04438	1.0167	0.973497
SPAC12B10.14c	1.21231	0.927671	0.765211	1.06123	1.08146	1.01906
SPAC12B10.15c	1.40513	1.26941	0.903409	1.483	1.43425	0.967128
SPAC12B10.16c	0.96309	0.926145	0.961639	0.992765	0.98245	0.98961
SPAC12G12.01c	1.45624	1.15359	0.792167	1.3218	1.17299	0.887417
SPAC12G12.03	1.04362	0.891068	0.853821	0.867364	1.01352	1.1685
SPAC12G12.07c	1.06225	0.988687	0.930746	1.06794	0.992033	0.928918
SPAC12G12.09	0.867947	0.970532	1.11819	1.00015	1.02363	1.02347
SPAC12G12.10	0.876123	0.845378	0.964908	0.908868	0.852844	0.938359
SPAC12G12.11c	1.40475	1.58422	1.12776	1.20695	1.24313	1.02997
SPAC12G12.12	1.07182	0.938546	0.875658	1.12623	0.987481	0.876804
SPAC12G12.13c	0.789775	0.625149	0.791554	0.904168	0.551706	0.610181
SPAC12G12.15	1.05214	1.18747	1.12862	0.998947	1.07695	1.07808
SPAC12G12.16c	1.22113	1.07285	0.878573	1.13542	1.19713	1.05435
SPAC1327.01c	1.20134	1.24087	1.03291	1.09419	1.04096	0.951348
SPAC139.01c	0.821861	0.955764	1.16293	0.972161	1.00981	1.03873
SPAC139.02c	1.12254	1.1734	1.04531	1.08146	1.08463	1.00293
SPAC139.03	1.04087	0.972154	0.933983	1.06913	1.08423	1.01412
SPAC139.04c	1.00217	1.08969	1.08733	1.03647	1.04382	1.00709
SPAC139.05	1.24053	1.29213	1.0416	1.13998	1.41424	1.24059
SPAC1399.01c	0.990816	1.05044	1.06017	1.003	1.02392	1.02085
SPAC1399.02	1.10485	1.07373	0.971832	1.08245	1.10659	1.0223
SPAC1399.03	0.82451	0.887787	1.07675	0.918832	0.870835	0.947763
SPAC1399.04c	0.934532	1.0781	1.15362	1.00779	0.97315	0.965627
SPAC1399.05c	0.837838	1.04495	1.2472	0.901896	0.975816	1.08196
SPAC13A11.01c	0.878616	0.830298	0.945006	0.93306	0.774177	0.829718
SPAC13A11.03	1.47418	1.28862	0.874129	1.19199	1.40781	1.18106
SPAC13A11.04c	1.13325	1.1115	0.980812	1.12164	1.35832	1.21102
SPAC13A11.05	0.91769	0.998246	1.08778	0.878423	1.02891	1.17131
SPAC13A11.06	1.43219	1.38181	0.964826	1.30642	1.6563	1.26781
SPAC13C5.01c	0	0	#DIV/0!	0	0	#DIV/0!
SPAC13C5.02	0.980696	0.946897	0.965535	0.762575	0.939746	1.23233
SPAC13C5.03	0.981541	1.26799	1.29183	1.03319	1.01271	0.980174
SPAC13C5.04	1.03307	0.854383	0.827035	0.73943	0.986797	1.33454
SPAC13C5.05c	0.895714	1.06855	1.19296	0.932441	0.922726	0.989582
SPAC13C5.06c	0.865547	1.00972	1.16657	0.906109	0.93722	1.03433
SPAC13C5.07	0.743293	0.95882	1.28996	0.874708	0.783953	0.896246
SPAC13D6.01	1.2505	1.62708	1.30114	1.19174	1.44493	1.21245
SPAC13D6.02c	1.16415	1.43869	1.23583	1.36676	1.48604	1.08727
SPAC13D6.03c	0.954787	1.24011	1.29884	1.0667	1.13619	1.06515
SPAC13D6.04c	1.19685	0.963665	0.805168	0.963467	0.936642	0.972157
SPAC13F5.01c	1.09579	0.96463	0.880307	0.976889	0.932051	0.954101
SPAC13F5.03c	1.48379	1.12113	0.755584	1.29805	1.32297	1.01919
SPAC13F5.04c	0.780397	0.922587	1.1822	0.975342	0.943056	0.966898
SPAC13F5.05	1.22256	1.25009	1.02251	1.09094	1.16395	1.06693
SPAC13F5.07c	0.43814	0	0	0.334426	0	0
SPAC13G6.01c	1.22346	1.16542	0.952566	1.25291	1.26577	1.01027
SPAC13G6.02c	0.821981	0.977583	1.1893	0.876728	0.938821	1.07082
SPAC13G6.03	1.11848	1.02224	0.91396	1.05714	1.09307	1.03399
SPAC13G6.04	1.04586	1.02933	0.984193	0.943726	0.864099	0.915625
SPAC13G6.08	1.07973	0.882206	0.817063	0.966151	0.697828	0.722276
SPAC13G6.09	0.653165	0.838628	1.28395	0.613682	0.622914	1.01504
SPAC13G6.10c	1.34384	1.26633	0.942319	1.14118	1.45538	1.27533
SPAC13G6.12c	1.01966	1.02822	1.0084	0.931839	0.907907	0.974317
SPAC13G6.13	0.92083	1.05293	1.14345	0.940716	1.00562	1.06899
SPAC13G6.14	0.923287	0.945321	1.02387	1.02122	0.984122	0.963677
SPAC13G6.15c	0.941357	1.12423	1.19426	0.811196	0.944819	1.16472
SPAC13G7.02c	0.000142511	0	0	0	0.00252003	#DIV/0!
SPAC13G7.03	1.36029	1.1945	0.878122	1.25791	1.07398	0.853779
SPAC13G7.04c	0.798675	0.505256	0.632618	0.758232	0.762536	1.00568
SPAC13G7.05	1.41589	0.690029	0.487345	1.26477	1.52507	1.20581
SPAC13G7.06	0.997399	0.945083	0.947548	1.08509	0.91502	0.843265
SPAC13G7.07	1.13609	0.973482	0.856871	1.04441	0.903263	0.864852
SPAC13G7.09c	0.906224	0.980392	1.08184	0.969004	0.92126	0.950729
SPAC13G7.11	1.47642	1.42873	0.967695	1.6648	1.62519	0.976209
SPAC13G7.12c	0.927696	1.12336	1.21091	0.99115	1.04298	1.05229
SPAC13G7.13c	1.42464	1.21966	0.856118	1.15667	1.27656	1.10365
SPAC140.01	1.06921	0.949785	0.888309	1.23277	1.23068	0.998305
SPAC140.02	0.749342	0.72209	0.963632	0.495642	0.478531	0.965477
SPAC140.03	0.794238	0.614739	0.773999	0.880608	0.592392	0.672708
SPAC140.04	1.13268	1.17057	1.03346	1.01986	1.05724	1.03665
SPAC1420.01c	1.058	0.986545	0.932461	1.05568	0.99919	0.946491
SPAC1420.03	1.46551	1.48122	1.01072	1.36388	1.33763	0.980757
SPAC144.01	1.33537	1.26042	0.94387	1.18194	1.22773	1.03874
SPAC144.02	0.80547	0.941986	1.16949	0.919744	0.883346	0.960425
SPAC144.03	0.990056	1.09162	1.10258	0.992883	0.957936	0.964803
SPAC144.04c	1.01638	0.620709	0.610703	0.857099	1.01716	1.18675
SPAC144.05	0.915776	1.17766	1.28597	0.97491	0.968323	0.993243
SPAC144.06	0.840431	0.872469	1.03812	0.969004	0.81052	0.836447
SPAC144.08	0.856675	0.844094	0.985314	0.662203	0.632196	0.954686
SPAC144.11	0.970167	1.05634	1.08883	0.978169	0.979449	1.00131
SPAC144.13c	0.940213	0.919177	0.977627	0.92567	0.968651	1.04643
SPAC144.14	1.03378	1.03194	0.998217	0.951939	0.955138	1.00336
SPAC144.17c	1.36728	1.26266	0.923482	1.19847	1.30682	1.09041
SPAC1486.01	1.19812	0.90705	0.757063	1.2696	1.1121	0.875949
SPAC1486.02c	1.38079	1.1604	0.840387	1.07473	1.22098	1.13608
SPAC1486.04c	0.777371	0.903973	1.16286	0.816581	0.730842	0.895003
SPAC1486.08	0	0	#DIV/0!	0	0	#DIV/0!
SPAC1486.10	0.932023	0.907062	0.973219	0.938158	0.988845	1.05403
SPAC14C4.01c	0.951532	0.838901	0.881631	1.0147	0.972192	0.958104
SPAC14C4.03	1.29876	1.47388	1.13483	1.18899	1.25531	1.05578
SPAC14C4.04	1.03559	1.031	0.995563	0.950911	1.04847	1.1026
SPAC14C4.05c	0.886929	1.10218	1.24269	0.972105	0.871396	0.896401
SPAC14C4.06c	1.00967	0.730452	0.723459	0.845612	0.792663	0.937384
SPAC14C4.07	1.00168	1.07863	1.07682	0.975492	1.00728	1.03259
SPAC14C4.08	1.11555	1.0735	0.962301	0.970426	1.03677	1.06837
SPAC14C4.09	1.22003	1.25968	1.0325	1.08721	1.07257	0.986538
SPAC14C4.10c	1.44609	1.43998	0.995775	1.33651	1.44581	1.08178
SPAC14C4.11	1.10745	1.03152	0.931437	1.01807	1.27851	1.25582
SPAC14C4.12c	1.02338	1.0273	1.00383	1.01547	1.0109	0.995504
SPAC14C4.13	0.989763	1.14406	1.15589	1.12499	1.10853	0.985366
SPAC14C4.14	0.718537	0.315798	0.439501	0.625038	0.474717	0.759502
SPAC14C4.15c	1.3804	1.20357	0.8719	1.19471	1.33418	1.11674
SPAC14C4.16	1.36372	0.635895	0.466293	1.036	0.536419	0.51778
SPAC1527.01	1.07016	1.01483	0.948292	1.12128	1.07613	0.95974
SPAC1527.02	1.22577	1.02272	0.834348	1.14228	1.04382	0.913802
SPAC1527.03	1.1129	1.03861	0.933249	1.2411	1.14578	0.923195
SPAC1556.01c	0.798187	0.566117	0.709254	0.722751	0.532401	0.736631
SPAC1556.02c	1.49841	1.08251	0.722439	1.3395	1.7899	1.33625
SPAC1556.03	1.42232	1.18907	0.836008	1.1683	1.04704	0.896207
SPAC1556.04c	1.01228	1.01859	1.00623	0.993203	1.00533	1.01221
SPAC1556.05c	0.614996	0.311655	0.506759	0.734891	0.191405	0.260453
SPAC1556.08c	0.876467	0.875179	0.99853	0.903401	0.743751	0.823279
SPAC1565.01	1.08013	0.891599	0.825459	1.15784	1.03737	0.895958
SPAC1565.02c	0.912776	0.993942	1.08892	0.957418	1.08607	1.13437
SPAC1565.03	1.16475	1.19934	1.0297	1.06527	1.05148	0.987054
SPAC1565.04c	1.01625	0.806144	0.793256	1.03814	1.02933	0.991516
SPAC1565.07c	1.08916	1.11015	1.01927	1.03787	1.14416	1.10241
SPAC15A10.03c	1.50623	1.27652	0.847497	1.24117	1.32126	1.06453
SPAC15A10.05c	1.10921	1.21569	1.096	1.08485	1.01986	0.940094
SPAC15A10.06	0	0	#DIV/0!	0	0	#DIV/0!
SPAC15A10.07	1.05258	1.09781	1.04297	1.06019	0.968304	0.913328
SPAC15A10.08	1.27435	1.56888	1.23112	1.4994	1.6439	1.09637
SPAC15A10.09c	1.04586	1.30378	1.24661	1.03477	1.04387	1.00879
SPAC15A10.10	1.12503	1.2374	1.09988	1.03615	1.03035	0.994398
SPAC15A10.11	1.13848	1.27812	1.12266	1.04285	1.05653	1.01311
SPAC15A10.15	1.30519	1.32665	1.01644	1.20051	1.34338	1.119
SPAC15A10.16	1.25701	1.27179	1.01176	1.09818	1.12178	1.02149
SPAC15E1.02c	1.02283	0.930508	0.90974	1.07873	0.996873	0.924121
SPAC15E1.03	0.435215	0.0999142	0.229574	0.398081	0.0103192	0.0259224
SPAC15E1.04	0	0	#DIV/0!	0	0	#DIV/0!
SPAC15E1.05c	1.47695	1.20675	0.817056	1.2123	1.40728	1.16083
SPAC15E1.06	1.10904	1.19975	1.08179	1.18965	1.23445	1.03765
SPAC15E1.07c	0.999044	0.985972	0.986915	1.10713	1.01392	0.915811
SPAC15E1.09	1.05642	0.981265	0.928856	1.05688	0.999621	0.945822
SPAC15F9.01c	0.863194	1.13219	1.31162	1.0559	1.03607	0.981219
SPAC15F9.02	0.811933	0.904757	1.11432	0.988085	0.95951	0.971081
SPAC16.01	1.03092	0.924015	0.896297	1.08179	1.02241	0.945113
SPAC16.03c	0.840977	1.06217	1.26302	0.934547	1.06734	1.14209
SPAC16.04	1.11919	1.21346	1.08424	1.00344	1.17884	1.1748
SPAC16.05c	0.838793	1.03364	1.23229	0.85796	0.960508	1.11953
SPAC1610.01	0.953407	0.925398	0.970622	0.874215	0.785999	0.899091
SPAC1610.02c	0.881772	0.617606	0.700416	0.918841	0.656447	0.714429
SPAC1610.03c	0.979897	1.17694	1.20108	1.02462	1.02561	1.00096
SPAC1610.04	1.40445	1.26925	0.903734	1.47292	1.38637	0.941241
SPAC1635.01	0.937897	1.18889	1.26761	1	1.06904	1.06904
SPAC1639.02c	0.92867	0.864799	0.931223	1.03446	0.961698	0.929664
SPAC167.01	0.913534	1.102	1.2063	0.972573	0.89909	0.924444
SPAC167.04	0.959896	1.23716	1.28885	1.03569	1.09036	1.05279
SPAC167.05	0	0	#DIV/0!	0	0	#DIV/0!
SPAC167.06c	1.46912	1.50492	1.02437	1.19265	1.55605	1.3047
SPAC167.07c	0.777819	0.883519	1.13589	0.875331	0.731411	0.835582
SPAC1687.05	0.825349	1.06833	1.2944	0.960885	0.97591	1.01564
SPAC1687.06c	0.977954	1.16047	1.18663	1.03537	1.02011	0.985253
SPAC1687.07	1.22345	1.24901	1.02089	1.0205	1.31856	1.29208
SPAC1687.08	1.03217	0.985795	0.955067	1.10788	1.0697	0.965539
SPAC1687.09	1.50834	1.32319	0.877248	1.26086	1.43515	1.13823
SPAC1687.10	1.47426	1.56469	1.06134	1.43878	1.54753	1.07558
SPAC1687.12c	0	0.000925326	#DIV/0!	0	0	#DIV/0!
SPAC1687.13c	1.47536	1.14909	0.778853	1.16659	1.22862	1.05317
SPAC1687.14c	1.02129	1.04814	1.02629	0.873307	0.938849	1.07505
SPAC1687.15	1.39332	1.30691	0.93798	1.16659	0.993551	0.851672
SPAC1687.16c	0.845359	1.04517	1.23636	1.0152	1.01072	0.995586
SPAC1687.17c	0.914687	1.04782	1.14555	0.91288	0.914258	1.00151
SPAC1687.19c	0.759725	0.638574	0.840533	0.686925	0.937822	1.36525
SPAC1687.21	1.07956	1.14406	1.05975	1.07717	1.00324	0.931363
SPAC1687.23c	0.99589	1.19993	1.20488	1.07932	1.05596	0.978353
SPAC16A10.02	1.11845	1.06163	0.9492	0.983637	1.00019	1.01683
SPAC16A10.03c	0	0	#DIV/0!	0	0	#DIV/0!
SPAC16A10.04	0.863227	1.05324	1.22012	0.946283	1.00627	1.06339
SPAC16A10.05c	0	0	#DIV/0!	0.000155836	0	0
SPAC16C9.01c	1.01104	0.892755	0.883009	1.01455	0.963232	0.949418
SPAC16C9.02c	1.09988	0.924778	0.840797	1.32795	1.04993	0.790644
SPAC16C9.04c	0.902539	1.04224	1.15479	0.918748	0.978422	1.06495
SPAC16C9.05	0.959271	0.825052	0.860083	0.954808	0.906108	0.948995
SPAC16C9.06c	1.00127	0.961535	0.960315	0.945457	0.800076	0.846232
SPAC16C9.07	0.961685	1.12975	1.17477	1.06277	1.05186	0.989728
SPAC16E8.01	0.887122	0.867997	0.978442	0.861508	0.732122	0.849815
SPAC16E8.05c	0.912045	0.874803	0.959167	1.00505	1.10574	1.10018
SPAC16E8.06c	0.902749	0.887406	0.983004	1.06949	0.947267	0.885717
SPAC16E8.08	0.925491	1.23812	1.3378	1.02057	1.17527	1.15158
SPAC16E8.12c	1.30126	1.38307	1.06287	1.4189	1.40054	0.98706
SPAC16E8.13	1.39748	1.11262	0.796156	1.22448	1.28693	1.051
SPAC16E8.14c	1.13589	1.10306	0.971093	0.941362	1.04454	1.1096
SPAC16E8.17c	1.10233	1.15445	1.04728	1.11943	1.0809	0.965583
SPAC16E8.18	1.00037	1.28754	1.28706	1.06639	1.26574	1.18695
SPAC1705.02	1.12592	1.15449	1.02537	1.04504	1.06734	1.02134
SPAC1751.01c	0.891264	1.00281	1.12515	0.971217	1.02187	1.05215
SPAC1751.04	0.932367	1.17278	1.25785	1	0.940061	0.940061
SPAC1782.01	1.06883	1.18907	1.1125	1.02151	1.07739	1.05471
SPAC1782.02c	1.03836	0.944684	0.909787	1.17469	0.956437	0.814202
SPAC1782.04	0.912189	1.08643	1.19102	1.04301	1.08422	1.03951
SPAC1782.05	1.38032	0.879356	0.637069	0.883123	0.872155	0.98758
SPAC1782.06c	1.01338	1.09947	1.08495	0.981767	1.00417	1.02282
SPAC1782.07	0	0	#DIV/0!	0	0	#DIV/0!
SPAC1782.08c	0.815163	0.93234	1.14375	1.03964	1.03447	0.995032
SPAC1782.09c	1.03735	0.71296	0.68729	1.01895	0.812132	0.79703
SPAC1782.11	0.767207	1.03629	1.35073	1.01496	0.84503	0.832575
SPAC1783.01	0.975509	1.05622	1.08273	0.974907	0.952686	0.977208
SPAC1783.02c	1.23969	1.25809	1.01484	1.18477	1.27872	1.0793
SPAC1783.04c	1.08388	0.897898	0.82841	1.04441	0.966031	0.924957
SPAC1783.05	1.05316	1.04462	0.991897	1.09594	1.11349	1.01601
SPAC1783.06c	1.45099	1.47677	1.01777	1.16481	1.44333	1.23911
SPAC1783.07c	0.0276471	0	0	0.395565	0.00162002	0.00409545
SPAC1783.08c	0.880835	0.958553	1.08823	0.901595	0.890481	0.987673
SPAC1786.01c	0.951406	0.955045	1.00383	0.927325	1.00578	1.08461
SPAC1786.02	0.954539	0.8731	0.914683	1.10019	0.98605	0.896255
SPAC1786.04	0.943577	1.04209	1.1044	0.879383	0.79192	0.90054
SPAC17A2.01	0.989763	1.04815	1.05899	0.956417	1.09051	1.1402
SPAC17A2.02c	1.34172	1.10561	0.824021	1.12239	1.32976	1.18476
SPAC17A2.05	0.965997	1.16481	1.20581	0.99626	0.931335	0.934832
SPAC17A2.06c	0.882744	1.06815	1.21003	1.0014	0.877845	0.876616
SPAC17A2.07c	1.04585	1.05344	1.00726	0.97088	0.975809	1.00508
SPAC17A2.09c	0.789272	0.90841	1.15095	1.05458	0.732449	0.694543
SPAC17A2.10c	1.05835	1.10173	1.04098	0.973371	0.870835	0.894659
SPAC17A2.11	0.92995	0.912575	0.981316	0.965854	0.894447	0.926069
SPAC17A2.12	0.910096	1.10797	1.21742	0.99439	0.91692	0.922093
SPAC17A2.13c	1.32689	1.24912	0.941394	1.12043	1.34098	1.19684
SPAC17A2.14	0.980046	1.08661	1.10874	0.972261	0.979135	1.00707
SPAC17A5.01	1.43367	1.28084	0.893397	1.07948	1.22989	1.13934
SPAC17A5.02c	0.843491	0.784121	0.929615	0.888804	0.604852	0.680523
SPAC17A5.04c	1.2849	0.648296	0.504549	1.05458	1.18307	1.12184
SPAC17A5.05c	0.844765	1.06761	1.2638	1.05499	1.02242	0.969128
SPAC17A5.07c	0.907109	0.626076	0.690188	0.905192	0.620404	0.685384
SPAC17A5.08	0.94226	0.838514	0.889896	0.816882	0.816383	0.999389
SPAC17A5.09c	0.873243	0.765985	0.877173	0.913616	0.812611	0.889445
SPAC17A5.10	1.00158	0.952901	0.951401	1.06157	1.00025	0.942239
SPAC17A5.11	1.01876	1.03412	1.01508	0.985819	1.05027	1.06537
SPAC17A5.14	0	0	#DIV/0!	0	0	#DIV/0!
SPAC17A5.16	0.750242	0.97268	1.29649	0.916723	0.965175	1.05285
SPAC17A5.18c	1.02602	1.03398	1.00775	1.03416	1.00624	0.972997
SPAC17C9.05c	1.05089	0.738679	0.702906	0.958657	0.617228	0.643847
SPAC17C9.07	0.999415	0.958147	0.958707	1.02839	0.837604	0.814482
SPAC17C9.08	1.03495	0.971113	0.938317	0.967613	0.937997	0.969393
SPAC17C9.09c	1.02683	0.933659	0.909264	0.956366	1.07113	1.12
SPAC17C9.10	0.846846	1.14801	1.35563	1.01082	1.02189	1.01095
SPAC17C9.11c	0.893005	1.08511	1.21513	0.94974	1.00641	1.05967
SPAC17C9.14	0.946868	1.08527	1.14617	0.928977	1.08906	1.17232
SPAC17C9.15c	0.84313	0.834698	0.989999	0.896301	0.754453	0.84174
SPAC17C9.16c	1.08584	1.11774	1.02938	1.03191	1.02982	0.997978
SPAC17D4.01	1.29706	1.19721	0.923018	1.22082	1.08972	0.892613
SPAC17D4.03c	1.06539	0.967689	0.908295	1.07324	1.10034	1.02525
SPAC17D4.04	1.32446	1.15304	0.870571	1.20102	1.32123	1.10009
SPAC17G6.02c	1.08034	1.02073	0.944821	1.02743	1.08251	1.05361
SPAC17G6.03	0.865912	1.03152	1.19126	0.943156	0.895841	0.949833
SPAC17G6.04c	0.843571	0.869919	1.03123	0.781071	0.81964	1.04938
SPAC17G6.05c	0.986473	0.948864	0.961875	0.95621	0.994499	1.04004
SPAC17G6.06	0.921761	0.900372	0.976796	0.977529	1.06305	1.08749
SPAC17G6.08	0.840431	0.957596	1.13941	0.930485	0.955297	1.02667
SPAC17G6.13	1.05538	0.981989	0.930463	1.01917	1.08346	1.06308
SPAC17G6.15c	1.01068	0.968634	0.958402	0.876449	0.9777	1.11552
SPAC17G6.17	0.768218	0.677709	0.882183	0.676214	1.01023	1.49395
SPAC17G8.05	0.348079	0.0131349	0.0377353	0.39681	0.00883882	0.0222747
SPAC17G8.06c	0.96724	0.927148	0.95855	0.896329	0.783487	0.874107
SPAC17G8.07	1.02578	1.0095	0.984129	0.992832	1.0698	1.07753
SPAC17G8.08c	1.43375	1.43777	1.0028	1.068	1.42401	1.33335
SPAC17G8.09	1.0222	0.95701	0.936229	1.01667	1.02068	1.00394
SPAC17G8.10c	1.47405	1.18867	0.806399	1.14887	1.22982	1.07046
SPAC17G8.11c	0.955097	0.971407	1.01708	0.892327	0.85352	0.956511
SPAC17G8.13c	0.825741	0.833226	1.00906	0.971939	0.999734	1.0286
SPAC17G8.14c	1.02742	1.02548	0.998112	1.02594	0.943199	0.919348
SPAC17H9.01	0.938008	0.836318	0.89159	0.973577	0.911529	0.936269
SPAC17H9.03c	0.878378	1.0381	1.18184	0.847427	0.98347	1.16054
SPAC17H9.04c	1.01696	0.96749	0.951351	1.17361	1.11412	0.949313
SPAC17H9.06c	0.777398	0.856645	1.10194	0.962095	0.97849	1.01704
SPAC17H9.08	0.811001	0.810571	0.99947	0.848683	0.838392	0.987873
SPAC17H9.09c	0.946492	1.02726	1.08533	1.08908	0.792281	0.72748
SPAC17H9.10c	0.564629	0.514181	0.910653	0.578484	0.331383	0.572848
SPAC17H9.11	0.941634	1.08861	1.15608	0.974755	0.977997	1.00333
SPAC17H9.12c	0.985121	1.15527	1.17272	0.989317	1.02223	1.03327
SPAC17H9.13c	0.877462	0.856223	0.975795	0.899932	0.838104	0.931297
SPAC17H9.14c	0.890965	0.873201	0.980063	0.969144	0.925835	0.955311
SPAC17H9.19c	0.608212	0.832909	1.36944	0.968576	0.662247	0.683733
SPAC1805.01c	0.960515	0.999905	1.04101	0.822711	0.973502	1.18329
SPAC1805.02c	0.740303	0.936193	1.26461	0.9199	0.745258	0.810151
SPAC1805.03c	1.08464	1.01757	0.938164	1.04621	0.946035	0.904245
SPAC1805.04	1.16306	0.982744	0.844964	0.894522	0.928203	1.03765
SPAC1805.05	0	0	#DIV/0!	0	0	#DIV/0!
SPAC1805.06c	0.884433	1.02715	1.16136	0.877753	0.951646	1.08419
SPAC1805.07c	1.06934	0.538179	0.503281	1.00285	0.52201	0.520525
SPAC1805.08	1.06763	0.900715	0.843656	0.988001	0.96415	0.97586
SPAC1805.09c	1.34175	1.18726	0.884855	1.09148	1.1948	1.09467
SPAC1805.10	0.837155	1.01116	1.20785	0.947638	0.906441	0.956527
SPAC1805.11c	1.10898	1.1746	1.05918	1.19439	1.11678	0.935016
SPAC1805.12c	1.01786	0.935469	0.919054	0.959483	0.934181	0.973629
SPAC1805.14	0.91457	0.767601	0.839303	0.894753	0.579976	0.648197
SPAC1805.15c	0.994967	1.12249	1.12817	1.00301	1.03485	1.03174
SPAC1805.16c	0.980101	0.954816	0.974202	0.934084	0.920104	0.985033
SPAC1834.03c	0.972424	0.891121	0.916392	1.06156	1.12026	1.0553
SPAC1834.04	1.16967	1.11047	0.949391	1.09464	1.10268	1.00734
SPAC1834.05	0.866901	0.797176	0.91957	0.953249	0.829856	0.870555
SPAC1834.07	1.43492	1.44456	1.00672	1.19984	1.4153	1.17958
SPAC1834.08	0.834659	0.859351	1.02958	0.926102	0.858839	0.92737
SPAC1834.09	1.01734	0.988433	0.971582	0.976107	0.992308	1.0166
SPAC1834.10c	1.12909	0.8922	0.790195	0.941951	0.947342	1.00572
SPAC1851.02	0.941036	0.946873	1.0062	0.94873	1.05501	1.11202
SPAC1851.03	0.887826	0.595167	0.670364	0.83606	0.760432	0.909542
SPAC1851.04c	0.78004	0.348161	0.446338	0.739191	0.567418	0.76762
SPAC186.01	1.06424	1.17808	1.10697	1.02782	1.1348	1.10408
SPAC186.02c	1.34098	1.099	0.819548	1.2102	1.29761	1.07223
SPAC186.03	0.812217	1.10717	1.36314	0.881476	0.963934	1.09355
SPAC186.05c	1.05724	1.16906	1.10576	1.01777	1.07565	1.05687
SPAC186.06	1.02504	1.07442	1.04817	1.08101	1.0669	0.986952
SPAC186.07c	0.95086	1.06632	1.12142	0.885345	0.979725	1.1066
SPAC186.08c	1.06945	0.900342	0.841878	1.07597	1.02967	0.956968
SPAC186.09	1.01037	0.899091	0.88986	1.05447	1.10333	1.04634
SPAC18B11.02c	0.906424	1.24086	1.36897	1.02037	0.98673	0.967031
SPAC18B11.03c	1.41205	1.43667	1.01743	1.09916	1.64785	1.49919
SPAC18B11.04	1.03144	1.03404	1.00251	1.05062	1.01355	0.964721
SPAC18B11.07c	1.08198	0.911395	0.842338	1.07511	1.12728	1.04852
SPAC18B11.08c	0.962599	1.11988	1.16339	1.02889	1.05138	1.02186
SPAC18B11.09c	0.953008	0.921541	0.966982	1.00212	0.943501	0.941503
SPAC18B11.11	0.842339	1.06007	1.25848	0.858585	0.97591	1.13665
SPAC18G6.01c	1.43851	1.56471	1.08773	1.18039	1.5479	1.31134
SPAC18G6.02c	0.878153	0.613493	0.698618	0.787984	0.788588	1.00077
SPAC18G6.04c	1.17666	0.994911	0.845535	1.13402	1.01124	0.891734
SPAC18G6.05c	0.995028	0.958909	0.963701	0.973371	1.03244	1.06069
SPAC18G6.09c	0	0	#DIV/0!	0	0.00017331	#DIV/0!
SPAC18G6.10	1.06084	0.649633	0.612378	0.976889	0.702405	0.719022
SPAC18G6.12c	1.14469	1.13725	0.993505	1.20719	1.05871	0.877001
SPAC18G6.13	1.01347	0.783538	0.773124	0.858731	0.683709	0.796185
SPAC18G6.15	1.07017	0.922979	0.862457	1.05563	0.845599	0.801035
SPAC1952.02	0.932068	1.15703	1.24136	0.918809	0.935129	1.01776
SPAC1952.03	1.32343	1.32417	1.00055	1.22569	1.47019	1.19948
SPAC1952.05	0.904367	0.576848	0.637848	1.01241	0.705266	0.696623
SPAC1952.06c	0.982793	0.986028	1.00329	0.946087	1.02933	1.08799
SPAC1952.07	1.01786	0.90524	0.889355	1.02867	1.08251	1.05234
SPAC1952.08c	1.03812	1.10385	1.06332	1.06724	1.06354	0.996528
SPAC1952.09c	0.876728	0.886652	1.01132	0.811419	0.846908	1.04374
SPAC1952.10c	1.09097	1.22754	1.12518	0.94042	1.01344	1.07765
SPAC1952.11c	1.05166	1.14814	1.09174	1.05082	1.09995	1.04675
SPAC1952.12c	0.940152	0.882576	0.938759	0.980089	0.862987	0.880519
SPAC1952.15c	0.990933	1.0001	1.00925	1.14514	1.15523	1.00881
SPAC1952.16	1.01427	0.918997	0.906064	1.0427	1.16749	1.11968
SPAC1952.17c	0.854871	0.854383	0.999429	0.768323	0.964998	1.25598
SPAC19A8.01c	1.06962	1.0585	0.989613	1.23714	1.05578	0.853405
SPAC19A8.02	0.874477	1.17572	1.34448	0.955736	1.05452	1.10336
SPAC19A8.03	0.945221	0.884967	0.936254	0.94873	0.919954	0.969669
SPAC19A8.04	0.96226	0.826319	0.858728	0.925666	1.0148	1.09629
SPAC19A8.05c	0.892262	1.00687	1.12845	0.910192	0.879309	0.96607
SPAC19A8.08	0.748814	0.944483	1.26131	0.990416	0.743501	0.750695
SPAC19A8.10	0.801734	0.900715	1.12346	0.683964	0.807284	1.1803
SPAC19A8.11c	0	0	#DIV/0!	0	0	#DIV/0!
SPAC19A8.14	0.946476	1.04548	1.1046	1.03015	0.999388	0.97014
SPAC19B12.04	1.37344	1.05566	0.768626	1.11407	1.02068	0.916166
SPAC19B12.06c	0.951406	1.08895	1.14457	0.983449	1.00611	1.02304
SPAC19B12.07c	0.970182	0.947959	0.977094	0.972417	1.10622	1.1376
SPAC19B12.08	0.999925	0.961535	0.961607	1.13511	1.12481	0.990926
SPAC19B12.09	0.936824	0.999333	1.06672	1.17089	1.05641	0.902223
SPAC19B12.10	0.869591	0.757173	0.870722	0.982235	0.912557	0.929062
SPAC19B12.11c	1.03296	0.903792	0.874956	0.909771	0.991464	1.0898
SPAC19B12.12c	1.15794	1.13853	0.983233	0.972091	1.10118	1.1328
SPAC19D5.01	0.881218	1.09212	1.23933	0.925598	1.01768	1.09948
SPAC19D5.02c	0.931651	0.97807	1.04982	1.04549	1.03626	0.991173
SPAC19D5.03	0.858411	1.03415	1.20473	0.88858	0.967591	1.08892
SPAC19D5.06c	0.868544	0.854015	0.983272	0.967703	0.916969	0.947573
SPAC19D5.07	1.04518	1.04036	0.995396	0.912708	1.10539	1.21111
SPAC19D5.11c	0.911591	1.10381	1.21086	0.93938	0.953528	1.01506
SPAC19E9.01c	0.978013	1.00366	1.02623	1.11442	1.01377	0.909684
SPAC19E9.02	0.923237	0.849048	0.919642	1.0326	0.901551	0.873088
SPAC19E9.03	0.800398	0.893345	1.11613	0.924281	0.815078	0.881851
SPAC19G12.02c	0.849793	0.906592	1.06684	0.870714	0.846008	0.971626
SPAC19G12.03	0.876604	1.0711	1.22187	0.946885	1.03314	1.09109
SPAC19G12.04	1.42008	1.47089	1.03578	1.31926	1.52379	1.15503
SPAC19G12.05	0.930658	0.959031	1.03049	0.945682	1.04763	1.10781
SPAC19G12.08	0.995613	0.743255	0.74653	1.14098	0.912462	0.799715
SPAC19G12.09	1.04189	1.05376	1.0114	1.02696	1.0224	0.995562
SPAC19G12.11	1.16233	0.60368	0.519371	0.896921	0.750153	0.836364
SPAC19G12.12	0.913425	0.96749	1.05919	1.03351	0.982422	0.950572
SPAC19G12.13c	0.78938	1.00335	1.27106	0.874962	0.899927	1.02853
SPAC19G12.15c	0.900265	0.853934	0.948537	0.881221	0.627911	0.712547
SPAC19G12.16c	0.869506	0.976088	1.12258	0.918748	0.99943	1.08782
SPAC1A6.01c	0.922331	0.924015	1.00183	1.02469	0.942489	0.919777
SPAC1A6.03c	0.788561	0.821776	1.04212	0.974421	0.963928	0.989232
SPAC1A6.04c	1.00314	0.800697	0.798194	0.983014	0.868869	0.883883
SPAC1A6.05c	1.28583	1.32233	1.02839	1.15679	1.22628	1.06008
SPAC1A6.06c	1.40026	1.52159	1.08665	1.1904	1.43752	1.20759
SPAC1A6.07	1.41116	1.38699	0.982873	1.27086	1.41728	1.11522
SPAC1A6.08c	1.01488	0.931989	0.918327	1.00383	0.915054	0.911563
SPAC1A6.09c	1.18848	1.08888	0.916199	1.17576	0.962944	0.818995
SPAC1A6.10	1.35347	0.749547	0.553798	1.06277	1.36073	1.28036
SPAC1B1.02c	0.983775	0.967075	0.983025	0.982954	0.885442	0.900797
SPAC1B1.04c	0.952355	0.775423	0.814217	1.00352	0.892908	0.889774
SPAC1B2.04	0	0	#DIV/0!	0	0	#DIV/0!
SPAC1B3.01c	1.23557	0.643608	0.520898	0.851708	0.689081	0.809058
SPAC1B3.02c	0.94345	0.826051	0.875565	0.979654	0.946743	0.966406
SPAC1B3.03c	0.795366	0.901083	1.13292	0.974115	0.99028	1.01659
SPAC1B3.04c	1.13459	0.911938	0.803757	1.09397	1.03149	0.942885
SPAC1B3.05	1.00844	0.992488	0.984177	1.09724	1.03338	0.941802
SPAC1B3.06c	1.24114	1.26686	1.02072	1.24136	1.42543	1.14828
SPAC1B3.07c	0.880374	0.835351	0.948859	0.964734	0.872234	0.904119
SPAC1B3.08	0.837672	0.93088	1.11127	1.11188	0.987145	0.88782
SPAC1B3.10c	0.94226	1.03571	1.09917	1.02272	0.989333	0.967354
SPAC1B3.15c	0.840349	1.03187	1.22791	0.95691	0.942114	0.984538
SPAC1B3.16c	0.843765	0.720829	0.854301	0.913616	0.956132	1.04654
SPAC1B3.17	0.970728	1.14782	1.18243	1.03699	1.07836	1.0399
SPAC1B9.02c	1.0094	1.11039	1.10004	1.07322	1.03247	0.962025
SPAC1D4.01	0.841589	1.02549	1.21851	1.16103	0.957505	0.824704
SPAC1D4.02c	1.40317	1.21014	0.862436	1.11855	1.30302	1.16492
SPAC1D4.03c	0.954	1.0136	1.06248	0.958493	0.872961	0.910764
SPAC1D4.05c	1.00704	0.853765	0.847796	0.998171	0.928769	0.930471
SPAC1D4.06c	0.892164	0.905894	1.01539	0.970593	0.91032	0.937901
SPAC1D4.09c	1.05835	1.17132	1.10674	0.929708	0.876957	0.94326
SPAC1D4.11c	0.844332	1.15232	1.36477	0.8331	1.00702	1.20876
SPAC1D4.13	0.96495	0.936374	0.970386	0.993611	0.959788	0.965959
SPAC1F12.04c	0.827822	1.05547	1.27499	0.902352	0.886132	0.982024
SPAC1F12.05	1.00391	1.07523	1.07104	1.0095	0.989942	0.98063
SPAC1F12.06c	1.19135	1.41825	1.19045	1.16125	1.31413	1.13165
SPAC1F12.10c	1.14633	1.08034	0.942439	1.24541	1.23931	0.995104
SPAC1F3.03	1.02106	0.986367	0.966023	1.17201	0.946218	0.807345
SPAC1F3.05	0.958972	0.990859	1.03325	0.958236	0.937215	0.978063
SPAC1F3.06c	0.897392	0.892388	0.994425	0.908057	0.887898	0.977801
SPAC1F3.07c	0	0	#DIV/0!	0	0	#DIV/0!
SPAC1F3.09	1.42322	1.43884	1.01097	1.05734	1.37892	1.30415
SPAC1F3.10c	0.740513	0.680695	0.919221	0.86774	0.577152	0.665121
SPAC1F5.03c	0.935845	1.09342	1.16837	0.924616	1.01246	1.095
SPAC1F5.05c	0.892805	0.609972	0.683209	0.97481	0.689637	0.707458
SPAC1F5.07c	0.919421	1.05482	1.14726	1.1429	1.10013	0.962576
SPAC1F5.08c	0.786317	0.890904	1.13301	0.991882	1.1174	1.12655
SPAC1F5.09c	1.60034	1.47793	0.923514	1.26169	1.54749	1.22652
SPAC1F5.10	0.564238	0.5223	0.925673	0.580965	0.354071	0.609453
SPAC1F7.01c	0.689536	0.836891	1.2137	0.879417	0.612613	0.696612
SPAC1F7.06	1.45788	1.50291	1.03088	1.2926	1.51815	1.17449
SPAC1F7.07c	0.610471	1.19371	1.9554	1.06898	1.14863	1.0745
SPAC1F7.08	0	0	#DIV/0!	0	0	#DIV/0!
SPAC1F7.09c	0.941987	1.01147	1.07376	1.0624	0.91246	0.858869
SPAC1F7.10	1.31054	1.05611	0.805863	1.25339	1.23459	0.985004
SPAC1F7.11c	0.58755	0.855824	1.4566	0.733832	0.789643	1.07605
SPAC1F7.12	0.788973	1.1492	1.45658	0.886525	1.08701	1.22615
SPAC1F7.13c	0.738352	0.201637	0.273091	0.503139	0.00230394	0.00457914
SPAC1F8.01	1.72962	1.62223	0.937912	1.22456	1.51935	1.24073
SPAC1F8.02c	0.91496	1.04113	1.13789	0.932441	0.983796	1.05508
SPAC1F8.03c	1.3268	1.01086	0.761875	1.10337	1.09948	0.996472
SPAC1F8.04c	0.000142268	0	0	0	0	#DIV/0!
SPAC1F8.05	1.43156	1.54448	1.07888	1.08613	1.26786	1.16733
SPAC1F8.06	1.81837	0.751645	0.413362	1.23295	1.45658	1.18138
SPAC1F8.08	0.932965	1.18146	1.26635	0.979585	0.991844	1.01251
SPAC20G4.01	0.980111	1.03709	1.05813	0.980088	0.930826	0.949738
SPAC20G4.02c	1.55597	1.48095	0.951789	1.23157	1.50769	1.22421
SPAC20G4.03c	0.98106	1.05464	1.075	1.09141	1.07394	0.983991
SPAC20G4.04c	0.954	1.20089	1.25879	0.988206	0.975911	0.987558
SPAC20G4.05c	0.881918	0.986284	1.11834	1.11964	0.984685	0.879463
SPAC20G4.07c	0.790745	0.667783	0.844498	0.820193	0.647993	0.79005
SPAC20G4.08	0.86458	0.970731	1.12278	1.105	1.10031	0.995754
SPAC20G8.02	0.99204	0.94606	0.95365	0.961885	0.908319	0.944312
SPAC20G8.04c	1.05099	1.04412	0.993462	1.10344	0.965154	0.874675
SPAC20G8.07c	1.01762	0.88017	0.864932	0.951294	0.937706	0.985716
SPAC20G8.08c	1.46148	1.41551	0.968551	1.07948	1.34275	1.24389
SPAC20G8.09c	1.11889	1.18753	1.06134	1.0559	1.02422	0.970003
SPAC20G8.10c	1.25483	1.1741	0.935661	1.02556	1.24324	1.21226
SPAC20H4.02	0.926837	0.235134	0.253696	0.56475	0.00701821	0.0124271
SPAC20H4.03c	1.45664	1.2928	0.88752	1.29521	1.34763	1.04047
SPAC20H4.04	1.15735	1.10035	0.950749	0.958502	1.08057	1.12735
SPAC20H4.05c	1.47866	1.29442	0.875396	1.12981	1.24753	1.1042
SPAC20H4.06c	1.1018	0.870732	0.790279	0.901057	1.04235	1.1568
SPAC20H4.07	0.898056	0.765499	0.852396	1.06138	0.791334	0.745571
SPAC20H4.08	1.44089	1.36602	0.948042	1.3477	1.16473	0.864234
SPAC20H4.09	0.831624	0.959194	1.1534	0.892384	0.885789	0.992609
SPAC20H4.10	1.42471	1.32609	0.930783	0.956678	1.09275	1.14224
SPAC20H4.11c	0.987043	0.890904	0.902599	1.06678	0.928916	0.870767
SPAC212.01c	0.957141	1.02732	1.07332	0.951935	1.05945	1.11294
SPAC212.02	1.32169	1.27771	0.966724	1.14969	1.35117	1.17525
SPAC212.03	0.800239	1.10435	1.38003	0.934081	0.92242	0.987516
SPAC212.04c	0.824364	0.87444	1.06075	0.768972	0.870835	1.13247
SPAC212.08c	0.958936	1.17072	1.22086	1.0219	1.44688	1.41587
SPAC21E11.03c	0.980873	0.862774	0.879598	1.0605	0.945144	0.891226
SPAC21E11.04	1.3766	1.19927	0.871178	1.31432	1.19534	0.909473
SPAC21E11.05c	1.30082	1.28859	0.990598	1.2016	1.2362	1.0288
SPAC222.04c	0	0	#DIV/0!	0	0	#DIV/0!
SPAC222.05c	0.852135	1.01926	1.19613	0.73407	0.985962	1.34314
SPAC222.07c	1.09536	1.02501	0.935769	1.09397	1.03043	0.941914
SPAC222.08c	0.702955	0.860183	1.22367	0.742074	0.805004	1.0848
SPAC222.12c	0	0	#DIV/0!	0	0	#DIV/0!
SPAC222.13c	0.984901	1.10449	1.12142	1.05157	1.01598	0.966153
SPAC222.14c	1.3694	0.886234	0.647168	1.08633	0.818096	0.75308
SPAC222.15	1.35745	1.35578	0.998771	1.08696	1.33099	1.22451
SPAC227.01c	1.12965	0.94606	0.837481	0.913893	0.944021	1.03297
SPAC227.03c	1.41006	1.4452	1.02492	1.11438	1.28149	1.14995
SPAC227.04	1.02283	0.912557	0.892189	0.969521	1.01141	1.04321
SPAC227.05	1.21895	0.970827	0.796448	1.18101	1.01702	0.861142
SPAC227.06	0.899842	1.13204	1.25805	0.94333	0.903727	0.958019
SPAC227.07c	1.07947	1.09908	1.01816	1.07803	1.0906	1.01166
SPAC227.10	1.40229	1.24066	0.884737	1.03849	1.13486	1.0928
SPAC227.11c	0.838665	0.661296	0.78851	0.932621	0.892894	0.957403
SPAC227.13c	0.741469	0.655508	0.884067	0.858261	0.555329	0.64704
SPAC227.14	0.663329	0.719884	1.08526	0.805984	0.591995	0.7345
SPAC227.15	0.833155	1.00806	1.20993	0.899993	0.881629	0.979596
SPAC227.17c	0.925607	0.784154	0.847178	1.05191	0.820454	0.779966
SPAC227.18	1.21676	1.09469	0.899676	1.11902	1.10903	0.991074
SPAC22A12.01c	1.08968	1.08624	0.996845	1.18252	1.38018	1.16716
SPAC22A12.02c	1.26208	1.21648	0.963872	1.17936	1.21912	1.03372
SPAC22A12.03c	1.08553	1.17045	1.07823	0.874972	0.86132	0.984398
SPAC22A12.04c	1.13227	1.033	0.912326	1.0486	1.09747	1.0466
SPAC22A12.06c	0.97404	1.07853	1.10727	1.03383	1.01581	0.982568
SPAC22A12.07c	0.648289	0.00305082	0.00470595	0.672691	0.104591	0.155482
SPAC22A12.10	0.675341	0.677583	1.00332	1.00373	0.67175	0.669253
SPAC22A12.11	1.15377	0.870732	0.754686	0.858018	1.07954	1.25817
SPAC22A12.14c	1.41962	1.29261	0.910526	1.04628	1.14378	1.09318
SPAC22A12.16	1.26616	1.07637	0.850103	1.1565	1.05955	0.916175
SPAC22A12.17c	0.969539	0.998599	1.02997	0.919599	1.0799	1.17431
SPAC22E12.01	1.05815	0.755619	0.714095	0.905507	0.921749	1.01794
SPAC22E12.03c	0.713829	0.650906	0.911851	0.778307	0.452282	0.58111
SPAC22E12.04	1.59155	0.741348	0.465803	1.19248	1.51237	1.26826
SPAC22E12.05c	1.14097	1.07423	0.941512	1.07511	1.02862	0.956762
SPAC22E12.06c	0.95876	1.05425	1.09959	0.994642	1.07669	1.08249
SPAC22E12.11c	1.20898	1.11063	0.918652	1.08562	1.06392	0.980015
SPAC22E12.14c	1.25566	1.12372	0.894924	0.976157	1.26328	1.29413
SPAC22E12.18	0	0	#DIV/0!	0	0	#DIV/0!
SPAC22E12.19	0.93134	0.949785	1.0198	0.886097	0.873707	0.986018
SPAC22F3.02	1.00691	1.0976	1.09007	1.02216	1.01037	0.988462
SPAC22F3.03c	1.25895	1.15395	0.916598	0.995792	1.1599	1.1648
SPAC22F3.04	1.29197	1.25283	0.969702	1.24135	1.30673	1.05267
SPAC22F3.06c	1.45355	0.993031	0.683175	1.32601	1.3953	1.05225
SPAC22F3.07c	0.868395	1.07811	1.24149	0.957301	1.01385	1.05907
SPAC22F3.08c	0.880652	0.807313	0.916722	1.17859	1.06791	0.906089
SPAC22F3.09c	1.27339	0.842977	0.661995	1.1515	0.943731	0.819565
SPAC22F3.10c	1.23222	1.13991	0.925088	1.0388	1.4171	1.36417
SPAC22F3.11c	1.5985	1.40683	0.880094	1.09693	1.41993	1.29445
SPAC22F3.12c	1.18885	1.15124	0.968361	1.17906	1.23179	1.04473
SPAC22F3.13	0.930829	0.890719	0.95691	0.962781	0.939227	0.975535
SPAC22F8.02c	0.925344	1.09429	1.18258	0.779599	0.918266	1.17787
SPAC22F8.03c	0.925198	0.960306	1.03795	0.96133	1.02826	1.06962
SPAC22F8.04	1.0621	1.04154	0.980641	1.00623	0.985015	0.978913
SPAC22F8.05	1.00459	1.19793	1.19245	1.07643	0.999239	0.928292
SPAC22F8.07c	0.84985	1.06727	1.25584	0.879326	0.986727	1.12214
SPAC22F8.09	1.29014	1.14806	0.88987	1.2467	1.21941	0.978112
SPAC22F8.11	0.95105	1.11232	1.16957	1.22394	1.15118	0.940552
SPAC22F8.12c	0.648733	0.189863	0.292667	0.692686	0.147984	0.213638
SPAC22G7.01c	1.08116	1.00791	0.932248	1.15714	1.09436	0.945747
SPAC22G7.02	1.10111	1.24029	1.1264	0.697055	1.19234	1.71054
SPAC22G7.03	1.13981	1.41768	1.24379	0.903798	1.00061	1.10712
SPAC22G7.04	0.89585	0.831978	0.928702	0.902046	0.867356	0.961543
SPAC22G7.05	0.801938	0.436793	0.544671	0.862624	0.573895	0.665289
SPAC22G7.06c	1.13205	1.30238	1.15046	1.10363	1.22648	1.11131
SPAC22G7.07c	0.861315	0.886277	1.02898	0.932149	1.00262	1.0756
SPAC22G7.08	0.994395	1.13024	1.13661	1.04753	1.00816	0.962413
SPAC22G7.11c	0.90923	1.00053	1.10041	0.961592	1.01179	1.0522
SPAC22H10.02	1.4555	1.43615	0.986707	1.14851	1.08289	0.942864
SPAC22H10.03c	0.99772	0.799342	0.801169	1.0519	0.925929	0.880242
SPAC22H10.04	0.964502	1.08698	1.12698	1.0508	0.928869	0.883962
SPAC22H10.07	0.939691	1.11829	1.19006	0.883435	0.702769	0.795497
SPAC22H10.08	1.00366	1.0348	1.03103	1.04806	1.19056	1.13596
SPAC22H10.09	1.37015	1.34275	0.979998	1.18451	1.28016	1.08075
SPAC22H10.11c	0.757483	0.993151	1.31112	0.901669	0.846167	0.938445
SPAC22H10.13	0.941168	0.955524	1.01525	0.953355	0.999756	1.04867
SPAC22H12.01c	1.13483	1.15897	1.02127	1.05804	1.13106	1.06901
SPAC22H12.02	0	0	#DIV/0!	0	0	#DIV/0!
SPAC22H12.05c	0.634812	0.818729	1.28972	0.708072	0.950216	1.34198
SPAC23A1.02c	1.11575	1.20357	1.07871	1.24962	1.21032	0.968551
SPAC23A1.03	1.1059	0.94814	0.85735	1.05236	0.895106	0.85057
SPAC23A1.04c	1.08422	1.09585	1.01072	1.08914	1.05918	0.972494
SPAC23A1.06c	0.944574	0.971113	1.0281	1.01128	1.05133	1.03961
SPAC23A1.07	0.954637	0.719703	0.753902	0.918809	0.672041	0.731426
SPAC23A1.09	1.23041	1.21043	0.983756	0.856455	1.02728	1.19945
SPAC23A1.11	1.16703	1.07195	0.918532	1.03273	1.03585	1.00303
SPAC23A1.14c	1.25258	1.28047	1.02226	1.04395	1.01072	0.968175
SPAC23A1.16c	0	0	#DIV/0!	0	0	#DIV/0!
SPAC23A1.19c	0.631325	0.00896177	0.0141952	0.441423	0.439178	0.994913
SPAC23C11.01	1.27887	1.20038	0.938628	1.18914	1.3012	1.09424
SPAC23C11.02c	0.630155	0.636924	1.01074	0.770895	0.72397	0.939129
SPAC23C11.04c	0.830596	0.860306	1.03577	0.852052	1.17695	1.38131
SPAC23C11.06c	1.06511	1.05436	0.989907	0.948691	1.08672	1.14549
SPAC23C11.07	1.01966	0.923322	0.905523	1.02814	0.95204	0.925985
SPAC23C11.08	1.09499	1.25405	1.14527	1.02384	1.08422	1.05897
SPAC23C11.10	1.07481	0.97131	0.903706	0.920991	0.729704	0.792303
SPAC23C11.13c	1.26848	1.29353	1.01975	1.20263	1.38148	1.14871
SPAC23C11.14	1.01398	1.00932	0.995411	1.09038	0.941958	0.863876
SPAC23C11.15	0.737757	0.399227	0.541136	0.661826	0.128489	0.194143
SPAC23C4.02	0.977954	1.10996	1.13499	0.934861	1.09237	1.16849
SPAC23C4.03	1.43419	1.37077	0.955779	1.19264	1.55068	1.3002
SPAC23C4.05c	0.970066	1.05288	1.08537	1.03684	1.20007	1.15743
SPAC23C4.06c	1.05777	1.13834	1.07617	1.14866	1.1596	1.00952
SPAC23C4.07	0.854734	0.813547	0.951813	0.984224	0.934325	0.949301
SPAC23C4.08	1.36759	1.17456	0.858849	1.37165	1.24192	0.905418
SPAC23C4.09c	1.02621	0.810458	0.789759	1.31372	0.88527	0.673864
SPAC23C4.11	0.00570342	0	0	0.185686	0.000699606	0.00376769
SPAC23C4.12	0.937756	0.888251	0.947209	0.917695	0.941129	1.02554
SPAC23C4.16c	1.1319	1.18925	1.05066	1.04192	1.00076	0.960495
SPAC23C4.17	0.991406	1.16554	1.17564	1.04893	1.04154	0.992953
SPAC23D3.01	1.01891	1.26962	1.24606	1.01574	0.978756	0.963589
SPAC23D3.03c	1.01831	1.2602	1.23755	1.05969	1.17071	1.10477
SPAC23D3.04c	1.07424	1.19552	1.1129	0.966304	1.0535	1.09024
SPAC23D3.09	0.776175	0.785591	1.01213	0.757675	0.720599	0.951067
SPAC23D3.10c	0.900662	1.06802	1.18581	1.04811	0.935577	0.89263
SPAC23D3.11	1.00034	0.953271	0.952944	1.04702	0.989942	0.945484
SPAC23D3.12	1.07987	1.19767	1.10909	0.975342	1.17066	1.20026
SPAC23D3.13c	0.871269	1.05359	1.20926	0.965689	1.08163	1.12006
SPAC23E2.01	0.874972	1.06236	1.21416	0.950132	0.84503	0.889382
SPAC23E2.03c	0.848079	1.02899	1.21332	1.03578	0.994051	0.959708
SPAC23G3.02c	0.857634	1.123	1.30941	0.974755	0.972876	0.998072
SPAC23G3.03	0.825042	0.922242	1.11781	0.912722	0.850953	0.932324
SPAC23G3.04	0.937356	1.05013	1.12031	1.03895	1.15073	1.10759
SPAC23G3.05c	0.847022	1.21206	1.43096	0.940782	0.972117	1.03331
SPAC23G3.07c	0.821722	1.0129	1.23266	0.954593	0.988611	1.03564
SPAC23G3.08c	0.874673	1.09983	1.25742	1.01387	1.01764	1.00372
SPAC23G3.10c	1.71262	1.7522	1.02311	1.43605	1.56673	1.091
SPAC23G3.12c	0.887035	0.951138	1.07227	0.96803	0.910399	0.940465
SPAC23H3.03c	1.14476	1.2602	1.10085	1.17376	1.25797	1.07174
SPAC23H3.04	0.920147	1.05277	1.14413	0.919651	0.933474	1.01503
SPAC23H3.05c	0.764791	0.518923	0.678516	0.931843	0.651847	0.699525
SPAC23H3.06	0.758416	1.07111	1.41229	1.01066	1.09083	1.07932
SPAC23H3.08c	0.975663	0.723605	0.741655	1.03952	0.799763	0.769361
SPAC23H3.09c	0	0	#DIV/0!	0	0	#DIV/0!
SPAC23H3.11c	0.921176	0.887597	0.963547	0.942503	0.96843	1.02751
SPAC23H3.12c	0.97658	1.18179	1.21013	1.06343	0.993588	0.934325
SPAC23H3.13c	0.421854	0.0253265	0.0600362	0.462938	0.0462349	0.0998728
SPAC23H3.14	0.959345	0.962914	1.00372	1.02839	1.03787	1.00922
SPAC23H3.15c	1.55023	1.31883	0.850729	1.46374	1.37171	0.93713
SPAC23H4.01c	1.0313	1.0531	1.02115	1.04534	1.02213	0.97779
SPAC23H4.02	0.821062	0.595797	0.725641	0.963787	0.917504	0.951979
SPAC23H4.08	0.893775	0.927047	1.03723	0.976395	1.09485	1.12132
SPAC23H4.09	1.18251	1.20145	1.01602	0.961375	1.07215	1.11522
SPAC23H4.10c	1.13517	0.681262	0.60014	0.876787	0.891803	1.01713
SPAC23H4.12	1.19245	1.20698	1.01218	1.37385	1.20507	0.877149
SPAC23H4.14	0	0	#DIV/0!	0	0	#DIV/0!
SPAC23H4.16c	0.840158	0.98916	1.17735	0.842311	0.936243	1.11152
SPAC23H4.17c	0.886423	0.535552	0.604172	0.906431	1.0539	1.16269
SPAC24B11.06c	0	0	#DIV/0!	0	0	#DIV/0!
SPAC24B11.07c	1.03092	0.999475	0.969498	1.09869	1.12634	1.02517
SPAC24B11.08c	1.08946	1.40755	1.29197	1.03569	1.12367	1.08495
SPAC24B11.10c	1.10369	1.20202	1.0891	1.05302	1.03927	0.986939
SPAC24B11.12c	0.959121	0.662865	0.691118	0.864578	0.565819	0.654445
SPAC24B11.13	0.847604	0.906635	1.06964	1.06234	0.985208	0.927397
SPAC24C9.02c	1.90326	2.15765	1.13366	1.51413	1.61556	1.06699
SPAC24C9.05c	1.24868	1.69718	1.35917	1.38477	1.44448	1.04312
SPAC24C9.07c	1.15806	1.64525	1.42069	1.46273	1.62061	1.10793
SPAC24C9.08	1.09394	1.18255	1.081	1.03163	1.01688	0.985699
SPAC24C9.12c	1.5038	1.38077	0.918185	1.13049	1.29541	1.14588
SPAC24C9.14	1.14266	1.26292	1.10524	1.01293	1.03585	1.02262
SPAC24C9.15c	1.22578	1.2797	1.04399	1.3855	1.09729	0.791976
SPAC24C9.16c	1.06086	1.1734	1.10608	0.989486	1.07612	1.08755
SPAC24H6.02c	1.34045	1.58915	1.18554	1.44405	1.36042	0.942092
SPAC24H6.03	1.02152	0.936792	0.917058	1.01447	0.875709	0.863218
SPAC24H6.04	1.32508	1.47588	1.1138	1.38433	1.37748	0.995048
SPAC24H6.07	0.696841	0.760416	1.09123	0.801439	0.706952	0.882103
SPAC24H6.08	1.38493	1.35119	0.975636	1.50752	1.37302	0.910775
SPAC24H6.09	0.877698	0.337653	0.384703	0.720316	1.03102	1.43135
SPAC24H6.10c	0.995497	1.14399	1.14917	0.976244	1.10573	1.13264
SPAC24H6.11c	1.27093	1.05464	0.829817	1.12444	1.05095	0.934644
SPAC24H6.13	1.16378	1.52785	1.31283	1.05494	1.0312	0.977491
SPAC25A8.01c	1.12047	1.1317	1.01003	1.10249	1.20191	1.09017
SPAC25A8.02	0.952848	1.1287	1.18456	1.01534	1.11066	1.09388
SPAC25A8.03c	1.05187	0.992826	0.943868	1.11571	1.16717	1.04612
SPAC25B8.01	1.01995	0.89331	0.875838	1.01486	1.01547	1.0006
SPAC25B8.05	0.844936	0.949625	1.1239	1.15317	1.03444	0.89704
SPAC25B8.06c	0.00142268	0	0	0.000145996	0.00139227	9.53637
SPAC25B8.07c	1.33255	1.19478	0.896606	1.14866	1.31613	1.1458
SPAC25B8.08	1.36179	1.09817	0.806416	1.37981	1.28872	0.933986
SPAC25B8.09	1.34607	1.3949	1.03628	1.00234	1.08658	1.08403
SPAC25B8.10	0.980943	1.06363	1.08429	1.01917	1.00341	0.984543
SPAC25B8.11	1.18123	1.21767	1.03085	1.02914	1.03168	1.00246
SPAC25B8.13c	1.03992	1.16331	1.11865	1.42423	1.16187	0.815789
SPAC25B8.15c	0.989511	0.889979	0.899412	0.914841	1.00279	1.09613
SPAC25B8.17	0.96106	1.01131	1.05229	0.918358	0.979602	1.06669
SPAC25B8.18	1.5133	1.58098	1.04472	1.63691	1.61069	0.983981
SPAC25B8.19c	1.66432	0.731874	0.439744	1.16731	1.40243	1.20141
SPAC25G10.01	1.1537	1.06702	0.92487	1.07205	0.958636	0.894207
SPAC25G10.02	0.851991	0.865365	1.0157	0.987287	0.907616	0.919302
SPAC25G10.03	0.722517	0.863065	1.19452	0.768428	0.812974	1.05797
SPAC25G10.05c	1.17456	0.911968	0.776436	0.961652	0.943376	0.980995
SPAC25G10.06	0.767357	0.913024	1.18983	0.761882	0.715478	0.939092
SPAC25G10.09c	1.18858	1.13975	0.958921	1.09474	1.05425	0.963011
SPAC25H1.02	0.996039	1.12137	1.12583	1.02041	0.986153	0.966424
SPAC25H1.03	1.55378	1.32361	0.851863	1.51144	1.43409	0.948823
SPAC25H1.04	0.971656	1.1158	1.14835	1.04676	1.05337	1.00632
SPAC25H1.05	1.04041	0.651313	0.626016	1.00944	0.645234	0.639202
SPAC25H1.06	0.853533	0.748597	0.877057	0.77513	0.565707	0.729821
SPAC25H1.07	0.799338	1.22571	1.53341	0.986017	1.38042	1.39999
SPAC25H1.09	0.783681	1.08822	1.3886	0.976174	0.947098	0.970214
SPAC26A3.01	0.994949	0.977058	0.982018	0.959543	0.917504	0.956188
SPAC26A3.02	0.942381	0.960244	1.01896	1.0036	1.04259	1.03885
SPAC26A3.04	1.06872	1.14347	1.06995	1.13716	1.12252	0.987123
SPAC26A3.06	0.867731	0.898454	1.03541	0.923262	0.888527	0.962378
SPAC26A3.07c	1.1997	1.1685	0.973996	1.12467	0.993999	0.88381
SPAC26A3.09c	1.02166	0.96041	0.940047	1.0206	1.01953	0.998948
SPAC26A3.10	0.934758	1.14363	1.22345	0.99626	1.08536	1.08943
SPAC26A3.11	1.96372	1.71278	0.872213	1.36455	1.68406	1.23415
SPAC26A3.14c	0.856538	0.89415	1.04391	0.919049	1.05529	1.14824
SPAC26A3.16	0.925491	1.06906	1.15512	1.02587	0.959977	0.93577
SPAC26A3.17c	1.14346	1.09692	0.9593	1.20689	1.08981	0.902992
SPAC26F1.01	0.803192	0.856064	1.06583	0.937874	0.838628	0.894181
SPAC26F1.02	0.858979	1.09349	1.27301	0.958703	0.965288	1.00687
SPAC26F1.03	0.00612276	0.0301226	4.91977	0.000292633	0.00017331	0.592244
SPAC26F1.04c	1.07876	0.482863	0.447609	1.17289	0.683658	0.582885
SPAC26F1.05	1.03112	0.948191	0.919572	1.11481	1.09616	0.983279
SPAC26F1.07	1.18659	1.06305	0.895883	1.14624	1.16187	1.01363
SPAC26F1.08c	0.894253	1.12879	1.26227	0.986598	0.968323	0.981477
SPAC26F1.09	0.611657	0.685316	1.12042	0.944165	1.02691	1.08764
SPAC26F1.10c	1.05254	1.15974	1.10185	1.16612	1.05539	0.90504
SPAC26F1.12c	1.13615	0.952998	0.838796	0.863655	1.22396	1.41719
SPAC26F1.14c	1.4012	1.47126	1.05	1.4385	1.57309	1.09357
SPAC26H5.02c	1.09827	1.20228	1.0947	1.04691	1.00303	0.958094
SPAC26H5.03	0.931613	1.05755	1.13518	1.01821	0.99715	0.97932
SPAC26H5.04	0.776696	0.840953	1.08273	0.989789	1.03093	1.04156
SPAC26H5.05	0.625481	0.617752	0.987644	0.890532	0.852489	0.95728
SPAC26H5.07c	0.525948	0.805034	1.53063	0.851738	0.977939	1.14817
SPAC26H5.08c	1.37073	1.19107	0.868928	1.23096	1.57262	1.27755
SPAC26H5.09c	1.50984	1.33432	0.883751	1.31398	1.2447	0.947269
SPAC26H5.10c	0.892301	0.905339	1.01461	0.994792	0.981827	0.986967
SPAC27D7.02c	1.09409	1.06725	0.975466	1.00483	0.982739	0.978014
SPAC27D7.03c	1.12751	0.935727	0.829908	0.901602	1.00399	1.11356
SPAC27D7.04	1.11125	0.829109	0.746106	1.18011	1.08835	0.922244
SPAC27D7.05c	1.53554	1.38431	0.901514	1.11555	1.36161	1.22057
SPAC27D7.06	0.882137	0.938529	1.06393	0.816739	1.12513	1.37759
SPAC27D7.08c	1.79535	1.04606	0.58265	1.2333	0.951473	0.771485
SPAC27D7.11c	1.05907	1.27875	1.20743	0.996692	1.00357	1.0069
SPAC27D7.12c	1.17403	0.953952	0.812546	0.688844	0.911237	1.32285
SPAC27D7.13c	0.974068	1.07485	1.10346	1.024	0.991085	0.967858
SPAC27D7.14c	0.726553	0.0738528	0.101648	0.577684	0.0265554	0.0459687
SPAC27E2.01	0.822061	0.85148	1.03579	1.00888	0.899848	0.891926
SPAC27E2.02	1.1096	1.15219	1.03838	0.702904	1.05737	1.50428
SPAC27E2.03c	1.05553	1.08082	1.02396	0.832788	0.925835	1.11173
SPAC27E2.07	0	0	#DIV/0!	0	0	#DIV/0!
SPAC27E2.09	1.48596	1.38747	0.933721	1.08965	1.24309	1.14082
SPAC27E2.11c	0	0	#DIV/0!	0	0	#DIV/0!
SPAC27F1.03c	1.1757	1.16798	0.99343	0.875976	0.962931	1.09927
SPAC27F1.05c	1.04462	0.984886	0.942821	1.04145	1.08687	1.04361
SPAC27F1.06c	1.03953	1.13603	1.09283	0.987845	1.16976	1.18416
SPAC27F1.08	1.32515	1.10928	0.837097	1.02206	1.18012	1.15465
SPAC27F1.10	0.902922	1.11395	1.23371	1.01667	1.02143	1.00468
SPAC29A4.02c	1.01652	1.12807	1.10974	0.979741	1.14207	1.16569
SPAC29A4.05	1.09462	1.25732	1.14864	0.95002	1.06603	1.12211
SPAC29A4.09	1.15432	1.02952	0.891886	0.860775	0.996365	1.15752
SPAC29A4.11	1.55608	1.35398	0.870125	1.29302	1.17721	0.910438
SPAC29A4.13	0.963456	1.17549	1.22008	1.00748	1.03528	1.02759
SPAC29A4.14c	0.916374	1.01403	1.10657	0.911797	1.14586	1.25671
SPAC29A4.16	0	0	#DIV/0!	0	0	#DIV/0!
SPAC29A4.17c	1.28481	0.955381	0.743599	1.12856	0.730273	0.647081
SPAC29A4.18	0	0	#DIV/0!	0	0	#DIV/0!
SPAC29A4.19c	0.956677	0.872413	0.91192	0.979351	0.980948	1.00163
SPAC29A4.20	0.685563	0.912552	1.3311	0.814163	0.774435	0.951203
SPAC29B12.02c	0.889149	0.951854	1.07052	1.04694	1.04381	0.997012
SPAC29B12.03	1.20558	1.11311	0.923304	1.29907	1.28333	0.98788
SPAC29B12.04	0.625551	0.546463	0.873571	0.622527	0.56944	0.914722
SPAC29B12.05c	0.820319	1.09448	1.33421	0.793996	0.946666	1.19228
SPAC29B12.06c	0.875678	0.959433	1.09565	1.10279	0.940718	0.853034
SPAC29B12.08	0.962123	1.06588	1.10784	0.969212	0.869436	0.897054
SPAC29B12.10c	0.92053	1.05894	1.15035	1.00707	1.01632	1.00919
SPAC29B12.11c	0.971835	1.06848	1.09944	0.836784	0.735009	0.878373
SPAC29B12.12	1.14706	1.35296	1.1795	1.09583	1.13372	1.03457
SPAC29B12.13	1.04641	0.844413	0.806961	0.99022	0.951063	0.960456
SPAC29B12.14c	1.56238	1.1	0.704056	1.15458	1.43449	1.24243
SPAC29E6.01	1.0647	0.897975	0.843406	1.14144	1.04373	0.914395
SPAC29E6.05c	0.859627	0.669304	0.778598	0.897209	0.925299	1.03131
SPAC29E6.07	1.02143	1.07413	1.05159	0.92898	0.910512	0.98012
SPAC29E6.09	0.761226	0.856297	1.12489	0.959871	0.937199	0.97638
SPAC29E6.10c	1.40901	1.31643	0.934294	1.25212	1.29781	1.03649
SPAC2C4.05	0.976908	0.987782	1.01113	0.956054	0.980463	1.02553
SPAC2C4.06c	1.29051	1.33549	1.03485	1.40623	1.39001	0.988463
SPAC2C4.07c	0.938619	1.31874	1.40498	1.0823	1.11906	1.03397
SPAC2C4.08	0.967342	1.13169	1.16989	1.01449	0.99981	0.985527
SPAC2C4.09	0.966594	1.05964	1.09626	1.01091	1.03926	1.02805
SPAC2C4.10c	1.2218	1.35984	1.11298	1.42069	1.34285	0.945209
SPAC2C4.14c	0.961214	1.07793	1.12142	0.992052	1.00645	1.01451
SPAC2C4.15c	0.866755	1.09924	1.26822	1.01699	1.08312	1.06503
SPAC2C4.16c	0.699017	0.39136	0.559871	0.643846	0.654507	1.01656
SPAC2C4.17c	0.89799	1.10327	1.2286	1.00919	0.926783	0.918339
SPAC2E12.03c	0.919338	1.07184	1.16588	0.99128	1.00544	1.01428
SPAC2E1P3.01	1.37943	1.63261	1.18354	1.27761	1.36721	1.07013
SPAC2E1P3.02c	0.97994	1.17923	1.20337	1.22228	1.15141	0.942019
SPAC2E1P3.04	1.04987	1.06378	1.01325	1.0954	1.13091	1.03242
SPAC2E1P3.05c	0.85887	0.83264	0.969459	0.875538	0.607553	0.693919
SPAC2E1P5.01c	1.02276	1.14132	1.11591	1.06533	1.21998	1.14516
SPAC2E1P5.02c	0.988886	0.945181	0.955804	1.093	1.08596	0.99356
SPAC2E1P5.03	1.19545	1.03525	0.865997	0.977638	1.01919	1.0425
SPAC2F3.01	1.04666	0.944059	0.90197	1.0722	0.992342	0.925524
SPAC2F3.02	1.07032	1.16246	1.08608	1.06249	1.13733	1.07044
SPAC2F3.05c	0.884503	1.03855	1.17416	0.995189	0.967704	0.972382
SPAC2F3.07c	0.524261	0.123468	0.235508	0.627698	0.47591	0.758183
SPAC2F3.08	1.14463	1.21651	1.0628	1.02791	1.04381	1.01547
SPAC2F3.12c	1.1186	1.08118	0.96655	0.99439	1.01612	1.02186
SPAC2F3.15	0.924146	0.96787	1.04731	0.978183	0.97022	0.991859
SPAC2F3.16	0.972573	0.918635	0.944541	0.922082	0.875759	0.949762
SPAC2F3.18c	0.947911	1.1239	1.18566	0.962911	1.06013	1.10096
SPAC2F7.02c	1.15575	0.901516	0.780029	0.95098	0.961609	1.01118
SPAC2F7.03c	1.26906	1.12303	0.884928	1.07266	1.11691	1.04125
SPAC2F7.04	0.818864	0.911207	1.11277	0.888203	0.919143	1.03483
SPAC2F7.06c	0.903481	1.02584	1.13543	0.938185	1.07704	1.14801
SPAC2F7.07c	1.17802	0.543082	0.461013	1.08025	1.02426	0.948169
SPAC2F7.08c	1.05822	0.963345	0.910348	0.977871	1.04951	1.07326
SPAC2F7.09c	0.958075	0.957734	0.999644	0.983949	1.05671	1.07395
SPAC2F7.10	1.07002	1.07412	1.00383	1.05828	1.24526	1.17668
SPAC2F7.11	0.984351	1.13176	1.14975	1.18242	1.29099	1.09181
SPAC2F7.17	0.793612	0.918859	1.15782	0.849383	0.901881	1.06181
SPAC2G11.03c	0	0	#DIV/0!	0	0	#DIV/0!
SPAC2G11.04	1.00082	1.04112	1.04027	1.0025	0.977758	0.975324
SPAC2G11.05c	1.06569	0.936555	0.878825	1.01153	1.12443	1.11161
SPAC2G11.06	0.899126	1.04703	1.16449	0.882034	0.955297	1.08306
SPAC2G11.07c	0.902649	1.02182	1.13203	0.965419	1.01649	1.0529
SPAC2G11.09	0.875861	1.131	1.2913	1.01807	1.0818	1.0626
SPAC2G11.10c	1.53498	1.2338	0.803791	1.29022	1.53102	1.18664
SPAC2G11.12	0.907257	0.599511	0.660796	0.831853	0.801214	0.963168
SPAC2G11.13	1.54722	1.17916	0.762114	1.14112	1.37348	1.20363
SPAC2G11.15c	1.59942	1.44011	0.900393	1.17814	1.46014	1.23936
SPAC2H10.01	1.0917	0.991945	0.908626	1.03834	1.09731	1.05679
SPAC2H10.02c	1.50278	1.56869	1.04386	1.23215	1.75899	1.42758
SPAC30.01c	1.33063	1.17065	0.879775	1.01054	1.09477	1.08335
SPAC30.02c	0.818175	0.878089	1.07323	0.810815	0.793627	0.978801
SPAC30.03c	0.886182	0.850937	0.960228	0.967586	0.914454	0.945088
SPAC30.04c	0.999925	0.967146	0.967219	0.993922	0.91047	0.916038
SPAC30C2.02	0.934172	0.996655	1.06689	0.933694	0.9966	1.06737
SPAC30C2.04	0.869934	1.0094	1.16032	0.90633	0.958865	1.05796
SPAC30C2.05	0.813202	0.903067	1.11051	0.948244	0.682736	0.72
SPAC30C2.06c	0.853945	0.74191	0.868803	0.894974	0.624053	0.697286
SPAC30C2.07	1.0552	1.24195	1.17698	1.17352	1.29429	1.10292
SPAC30C2.08	1.02384	1.0817	1.05652	1.0391	0.964757	0.928451
SPAC30D11.01c	1.15059	1.27161	1.10518	1.20103	1.14036	0.94949
SPAC30D11.02c	0.940456	1.10035	1.17002	0.718268	0.774177	1.07784
SPAC30D11.05	0.809447	0.95357	1.17805	1.12115	1.06463	0.949583
SPAC30D11.06c	0.892074	0.968252	1.0854	1.15074	1.09453	0.951157
SPAC30D11.07	1.24214	1.29357	1.04141	1.27104	1.28368	1.00994
SPAC30D11.09	1.12848	1.00988	0.894902	0.900316	1.1591	1.28744
SPAC30D11.10	0.828079	0.804078	0.971015	0.790107	0.646949	0.818812
SPAC30D11.11	1.11417	1.10847	0.994886	1.07909	1.06935	0.99098
SPAC30D11.12	1.16532	1.19834	1.02834	1.02752	1.10912	1.07941
SPAC30D11.13	0.459009	0.11096	0.241739	0.00607761	0.00208649	0.343309
SPAC30D11.14c	1.34985	1.27754	0.94643	1.51249	1.47773	0.977019
SPAC31A2.02	1.05975	1.14178	1.0774	1.03657	1.11347	1.07419
SPAC31A2.06	0.653836	0.255061	0.3901	0.580951	0.172136	0.2963
SPAC31A2.09c	0.813464	0.853706	1.04947	0.930311	0.978108	1.05138
SPAC31A2.11c	0	0	#DIV/0!	0	0	#DIV/0!
SPAC31A2.12	1.25258	1.36124	1.08674	1.09553	1.16154	1.06026
SPAC31A2.13c	0.713235	0.341643	0.479005	0.469102	0.580239	1.23691
SPAC31A2.14	0.986698	1.03247	1.04639	1.04001	1.04351	1.00336
SPAC31A2.15c	0.885198	1.04361	1.17895	0.912137	0.883709	0.968834
SPAC31A2.16	0.968986	0.901801	0.930665	0.975222	0.983687	1.00868
SPAC31F12.01	0	0	#DIV/0!	0	0	#DIV/0!
SPAC31G5.03	0.849372	0.853647	1.00503	0.683761	0.696677	1.01889
SPAC31G5.04	0.851217	0.982837	1.15463	0.890043	0.892028	1.00223
SPAC31G5.07	0.902689	1.0826	1.19931	1.17936	1.04682	0.887616
SPAC31G5.09c	1.06711	1.02915	0.964421	1.04901	1.00414	0.957226
SPAC31G5.10	1.09139	1.02915	0.942971	1.05157	1.37447	1.30706
SPAC31G5.11	1.36519	0.983807	0.720638	0.971359	0.76849	0.791149
SPAC31G5.12c	1.10861	1.14734	1.03494	0.985115	1.09043	1.10691
SPAC31G5.14	0.834379	0.66007	0.791091	0.903943	0.862045	0.95365
SPAC31G5.15	1.33834	1.49296	1.11554	1.06906	1.36518	1.27699
SPAC31G5.17c	1.16818	1.29488	1.10846	1.00072	0.943244	0.942566
SPAC31G5.18c	1.1212	0.380094	0.339006	1.02383	0.235002	0.229533
SPAC31G5.19	0.897093	0.647117	0.721349	0.916784	0.71415	0.778974
SPAC31G5.21	0	0	#DIV/0!	0	0	#DIV/0!
SPAC323.01c	1.13183	0.952901	0.841912	0.668709	0.91573	1.3694
SPAC323.03c	0.976734	0.789142	0.80794	0.890628	0.989428	1.11093
SPAC323.04	1.06593	1.00223	0.940242	1.1133	1.06571	0.957253
SPAC323.05c	0.511921	0.286875	0.560389	0.717636	0.240354	0.334924
SPAC323.07c	1.48707	1.53415	1.03166	1.11449	1.19601	1.07315
SPAC328.01c	0.933114	0.940176	1.00757	1.13402	1.13581	1.00158
SPAC328.02	0	0	#DIV/0!	0	0.000349803	#DIV/0!
SPAC328.03	1.13759	1.05376	0.926312	0.980089	0.964754	0.984353
SPAC328.04	1.08901	0.92316	0.847709	1.09288	1.1415	1.04449
SPAC328.05	0.941068	1.04186	1.1071	0.93584	1.05962	1.13226
SPAC328.06	1.10649	0.915377	0.827277	1.04847	1.04818	0.999727
SPAC328.07c	0.974392	1.01156	1.03814	1.00007	1.13157	1.13149
SPAC328.09	1.10395	1.18527	1.07366	1.1108	1.11002	0.999294
SPAC328.10c	0.933114	0.754457	0.808537	0.957924	0.942716	0.984124
SPAC32A11.01	0.832875	0.867629	1.04173	0.937751	0.911653	0.97217
SPAC32A11.02c	1.40174	1.22834	0.876299	1.22837	1.25335	1.02033
SPAC32A11.03c	1.41727	1.4049	0.991269	1.08131	1.26721	1.17192
SPAC343.04c	0.94821	0.8837	0.931966	0.997351	0.944992	0.947503
SPAC343.06c	1.22975	1.21003	0.983967	1.00072	1.1073	1.10651
SPAC343.07	0.943278	0.838266	0.888673	0.97678	0.935888	0.958135
SPAC343.09	0.901579	0.570693	0.632993	0.806397	0.892348	1.10659
SPAC343.10	1.03523	1.07964	1.0429	1.07442	1.01479	0.944494
SPAC343.11c	0.876168	0.855281	0.976161	0.900577	0.676404	0.751078
SPAC343.12	1.54523	1.29002	0.834837	1.13995	1.38302	1.21322
SPAC343.15	0.919192	1.03529	1.12631	1.14811	1.10355	0.961186
SPAC343.16	0.981457	0.934693	0.952352	1.00256	0.963794	0.961337
SPAC343.18	1.28466	1.22998	0.957435	1.07387	0.955235	0.889529
SPAC343.19	1.36159	1.37701	1.01133	1.39573	1.3766	0.986295
SPAC343.20	0.972424	1.07539	1.10589	0.966651	1.136	1.17519
SPAC3A11.02	0.936527	0.898773	0.959686	0.923714	0.962299	1.04177
SPAC3A11.03	1.39899	1.17025	0.836499	1.26783	1.25316	0.988425
SPAC3A11.04	1.05967	1.10404	1.04187	1.04031	0.964289	0.92692
SPAC3A11.05c	1.04197	1.12313	1.07789	1.05657	0.995301	0.942008
SPAC3A11.06	1.34103	1.22176	0.911061	1.1005	1.24237	1.12891
SPAC3A11.07	0.754753	0.540948	0.716722	0.889404	0.574202	0.645603
SPAC3A11.08	0.909375	1.15642	1.27166	0.999927	1.00801	1.00808
SPAC3A11.09	0.751316	0.779473	1.03748	0.899044	0.693352	0.77121
SPAC3A11.10c	1.04043	0.901439	0.86641	0.835437	1.18892	1.42311
SPAC3A11.11c	0.982743	1.02355	1.04152	1.0108	1.00394	0.993213
SPAC3A11.13	0.935099	0.807706	0.863765	1.05509	0.804853	0.76283
SPAC3A11.14c	0.880082	0.830394	0.943541	1.08661	0.944644	0.869353
SPAC3A12.03c	0.913983	0.94633	1.03539	0.985196	0.967564	0.982104
SPAC3A12.06c	1.0476	0.958639	0.915077	1.11594	1.02409	0.917691
SPAC3A12.08	1.00187	1.08607	1.08405	0.980365	1.10907	1.13128
SPAC3A12.09c	0.975712	0.904335	0.926847	1.03647	1.08763	1.04937
SPAC3A12.10	0.935275	0.991813	1.06045	0.86998	1.03358	1.18806
SPAC3A12.12	1.03281	0.935288	0.905578	1.0681	1.033	0.967142
SPAC3A12.13c	0.851217	0.679685	0.798486	0.826981	0.594801	0.719244
SPAC3A12.17c	1.01629	1.12743	1.10936	1.02105	1.03128	1.01002
SPAC3C7.01c	0.957616	1.02421	1.06954	1.00767	0.937957	0.930819
SPAC3C7.02c	1.04715	1.08506	1.0362	1.06646	0.994561	0.932585
SPAC3C7.03c	1.03339	0.97733	0.945755	0.930158	0.905418	0.973403
SPAC3C7.04	0.868993	0.616164	0.709055	0.876734	0.60091	0.685397
SPAC3C7.05c	0.965695	1.0454	1.08253	1.0624	1.36886	1.28846
SPAC3C7.06c	1.35267	0.810683	0.59932	1.10557	0.990295	0.895734
SPAC3C7.07c	1.16584	1.1084	0.950732	0.859496	1.17009	1.36137
SPAC3C7.08c	1.20721	1.14974	0.952396	1.06889	0.923589	0.864064
SPAC3C7.09	0.977171	0.95142	0.973647	0.906877	0.939397	1.03586
SPAC3C7.10	0.941796	1.13586	1.20605	0.987765	1.21592	1.23098
SPAC3C7.12	1.10859	0.841343	0.758933	1.04145	0.971358	0.932696
SPAC3C7.13c	1.26137	1.20976	0.959085	1.09689	1.18351	1.07897
SPAC3C7.14c	1.05194	1.07331	1.02032	1.01309	0.964466	0.952009
SPAC3F10.02c	1.01681	0.820889	0.807314	0.992832	0.890364	0.896793
SPAC3F10.04	0.928195	0.981981	1.05795	0.965694	1.03717	1.07401
SPAC3F10.05c	0.896424	1.02596	1.14451	1.04375	0.99558	0.953847
SPAC3F10.06c	0.940886	0.994479	1.05696	0.955431	1.07758	1.12785
SPAC3F10.09	1.16993	1.29335	1.1055	1.01831	1.03174	1.01319
SPAC3F10.10c	1.03059	0.90769	0.88075	0.965034	1.02054	1.05751
SPAC3F10.11c	0.950775	1.02974	1.08306	1.00985	0.833971	0.825833
SPAC3F10.12c	1.19588	1.03475	0.865266	1.09314	1.19209	1.09052
SPAC3F10.13	0.923311	0.987576	1.0696	1.06315	0.920449	0.865776
SPAC3F10.15c	1.33134	1.61273	1.21136	1.29863	1.19857	0.922948
SPAC3F10.16c	0.647934	0.514798	0.794522	0.583294	0.422041	0.723547
SPAC3F10.17	1.00936	0.87158	0.863498	0.877409	0.867337	0.988521
SPAC3F10.18c	0.949631	1.0279	1.08242	0.972916	0.910024	0.935357
SPAC3G6.01	1.27696	1.3088	1.02494	0.961652	1.63545	1.70066
SPAC3G6.02	1.0074	1.14689	1.13847	0.99252	1.02902	1.03678
SPAC3G6.03c	0.921457	1.03775	1.12621	1.02511	1.03162	1.00635
SPAC3G6.04	1.27069	0.723997	0.569765	0.805758	1.11132	1.37923
SPAC3G6.05	0.977333	0.983888	1.00671	0.99896	1.04976	1.05085
SPAC3G6.06c	0.813377	0.992991	1.22082	0.866186	0.876424	1.01182
SPAC3G6.09c	1.26949	0.859162	0.676778	1.06511	1.09891	1.03173
SPAC3G6.11	0.84762	0.959001	1.1314	0.926601	0.838961	0.905417
SPAC3G6.13c	0.90337	1.06471	1.1786	0.971638	0.900607	0.926896
SPAC3G9.01	0.866315	0.70849	0.817821	0.862567	0.843243	0.977597
SPAC3G9.03	0.89105	0.937935	1.05262	1.07141	0.945693	0.882661
SPAC3G9.04	1.20903	0.730926	0.604557	1.14321	0.984067	0.86079
SPAC3G9.05	0.87894	0.994744	1.13175	0.994136	1.05116	1.05736
SPAC3G9.07c	1.41468	0.671972	0.474998	0.963088	0.985377	1.02314
SPAC3G9.08	1.03027	0.331252	0.32152	0.331931	0.00284522	0.00857173
SPAC3G9.11c	1.08954	1.30586	1.19854	1.01566	1.15179	1.13404
SPAC3H1.03	1.0778	0.924206	0.857493	0.95002	0.96843	1.01938
SPAC3H1.04c	0.108658	0	0	0	0	#DIV/0!
SPAC3H1.05	1.50078	1.30962	0.872624	1.11049	1.31487	1.18405
SPAC3H1.06c	1.46955	1.38438	0.942045	1.18093	1.30785	1.10748
SPAC3H1.07	0.837616	0.970373	1.15849	0.977748	0.975353	0.99755
SPAC3H1.08c	1.1709	1.05468	0.900743	1.17469	1.03933	0.884768
SPAC3H1.09c	0.986342	1.01033	1.02431	1.01044	0.992517	0.982263
SPAC3H1.10	1.48225	1.33551	0.900998	1.14664	1.27086	1.10834
SPAC3H1.11	0	0	#DIV/0!	0	0	#DIV/0!
SPAC3H1.12c	1.40858	0.679702	0.482544	1.19346	1.11133	0.931187
SPAC3H1.13	1.37942	1.44538	1.04782	0.994078	1.15383	1.1607
SPAC3H1.14	0.994129	0.826235	0.831114	0.790258	0.900842	1.13993
SPAC3H5.04	1.0204	1.00446	0.984381	1.03563	1.01836	0.983319
SPAC3H5.05c	1.08643	1.08361	0.997407	1.0124	1.04644	1.03362
SPAC3H5.07	1.14027	0.682958	0.598942	0.903382	0.591426	0.654681
SPAC3H5.08c	1.18153	1.25242	1.06	0.993767	1.3291	1.33743
SPAC3H5.09c	0.986342	1.14871	1.16462	1.05964	1.00592	0.949301
SPAC3H5.10	0.684402	0.517892	0.756707	0.585886	0.118742	0.20267
SPAC3H5.12c	1.13788	1.02435	0.900222	0.857878	1.03281	1.20392
SPAC3H8.02	1.15695	1.151	0.994857	0.990377	1.30257	1.31522
SPAC3H8.03	1.26044	1.09385	0.867833	1.23625	1.20618	0.975681
SPAC3H8.04	0.979565	0.863766	0.881786	0.977536	0.954187	0.976115
SPAC3H8.05c	0.323129	0.00157618	0.00487788	0.218597	0	0
SPAC3H8.07c	1.11546	0.798986	0.716283	1.03023	0.796282	0.772915
SPAC3H8.08c	1.14033	0.812251	0.712295	0.899219	0.857409	0.953504
SPAC3H8.09c	1.27859	1.02469	0.801427	1.05904	1.16724	1.10217
SPAC3H8.10	0	0	#DIV/0!	0.000319872	0.000349803	1.09357
SPAC458.02c	0.977857	1.02674	1.04999	0.976719	0.976418	0.999691
SPAC458.04c	0.988079	1.08856	1.1017	0.991129	1.03587	1.04514
SPAC458.05	0.878503	0.758052	0.86289	0.996131	0.599199	0.601527
SPAC458.06	1.45993	1.4989	1.0267	1.46869	1.5143	1.03105
SPAC4A8.02c	1.39028	1.33358	0.959218	1.05116	1.23878	1.17849
SPAC4A8.03c	0	0	#DIV/0!	0	0	#DIV/0!
SPAC4A8.04	1.04282	1.03282	0.990413	1.08446	0.985207	0.908478
SPAC4A8.05c	1.24535	0.975292	0.783148	0.986286	0.987102	1.00083
SPAC4A8.06c	0.721874	1.07356	1.48718	0.655059	0.85182	1.30037
SPAC4A8.07c	1.06978	1.11195	1.03942	1.05817	1.02685	0.970406
SPAC4A8.09c	1.03627	0.592024	0.571305	1.17981	0.83408	0.706959
SPAC4A8.10	1.1145	0.932574	0.836768	1.00344	0.723917	0.721436
SPAC4A8.14	0.873809	1.09401	1.252	1.1357	1.02436	0.901965
SPAC4C5.01	1.67058	1.30437	0.780791	1.19822	1.29059	1.07709
SPAC4C5.02c	0	0	#DIV/0!	0	0	#DIV/0!
SPAC4C5.03	1.51461	1.50518	0.993778	1.21923	1.44288	1.18344
SPAC4C5.04	0.982928	0.611342	0.62196	1.06767	0.624086	0.584532
SPAC4D7.01c	0.968332	0.997449	1.03007	1.10803	1.00024	0.902719
SPAC4D7.02c	1.32282	1.42259	1.07542	1.19219	1.41404	1.18609
SPAC4D7.03	1.86091	1.76149	0.946577	1.41365	1.29601	0.916784
SPAC4D7.06c	0.99294	0.919695	0.926233	1.02352	0.91821	0.897107
SPAC4D7.07c	0.965445	0.865606	0.896587	1.08358	0.838281	0.773622
SPAC4D7.10c	0.909842	0.35289	0.387858	0.753676	0.463085	0.614435
SPAC4D7.11	0.877363	0.975292	1.11162	0.985507	0.951821	0.965818
SPAC4F10.02	1.30754	1.42348	1.08867	1.1944	1.51976	1.2724
SPAC4F10.04	1.0449	1.09257	1.04563	0.816473	0.677394	0.829658
SPAC4F10.05c	0.612747	0.537833	0.877741	0.812614	0.44048	0.542054
SPAC4F10.06	0.73449	0.159341	0.216941	0.458569	0	0
SPAC4F10.07c	1.3539	0.677472	0.500384	0.977849	1.04679	1.0705
SPAC4F10.08	1.18558	0.979884	0.826501	1.2008	1.21207	1.00938
SPAC4F10.11	1.42337	1.04815	0.736383	1.23838	0.923131	0.745431
SPAC4F10.13c	0	0	#DIV/0!	0	0.00748347	#DIV/0!
SPAC4F10.14c	1.20966	0.995218	0.822722	1.10803	0.88869	0.802041
SPAC4F10.15c	0	0	#DIV/0!	0.00291992	0	0
SPAC4F10.16c	0.948609	0.992354	1.04611	1.01113	0.914669	0.904605
SPAC4F10.17	1.05244	0.856482	0.813803	0.880992	0.987406	1.12079
SPAC4F10.18	1.00925	1.02759	1.01817	1.16665	1.07014	0.917269
SPAC4F10.19c	0.809244	0.874069	1.0801	0.9199	0.817014	0.888155
SPAC4F10.20	1.04382	1.05627	1.01193	1.03747	0.958554	0.923937
SPAC4F8.01	1.03627	0.572962	0.552911	1.02481	0.622094	0.607033
SPAC4F8.03	0.0159046	0.000185065	0.011636	0.00229744	0	0
SPAC4F8.08	1.39162	1.36649	0.981944	1.3533	1.42415	1.05236
SPAC4F8.10c	1.26992	1.42677	1.12352	1.18402	1.45045	1.22503
SPAC4F8.11	1.52629	1.64708	1.07914	1.30513	1.53974	1.17976
SPAC4F8.15	1.22164	1.17331	0.960445	1.25701	1.08393	0.862312
SPAC4G8.03c	1.04163	1.00143	0.961409	1.04424	1.09844	1.05191
SPAC4G8.04	1.67479	1.60894	0.960684	1.06936	1.5599	1.45872
SPAC4G8.05	1.66553	1.54196	0.92581	1.12362	1.33273	1.1861
SPAC4G8.06c	1.26527	1.34886	1.06607	1.2115	1.21334	1.00152
SPAC4G8.07c	0.935981	1.08146	1.15543	1.04394	1.0592	1.01462
SPAC4G8.08	1.43181	1.40335	0.980124	1.08619	1.42057	1.30785
SPAC4G8.10	1.08233	0.818729	0.756448	0.83872	0.952413	1.13556
SPAC4G8.11c	0.93933	0.635699	0.676758	0.796906	0.689713	0.865489
SPAC4G8.13c	1.14265	1.03313	0.904155	0.969178	1.06816	1.10213
SPAC4G9.02	1.43352	1.2839	0.89563	1.19991	1.33147	1.10965
SPAC4G9.05	1.26781	1.41878	1.11908	1.28167	1.18297	0.922985
SPAC4G9.06c	0.9092	0.800796	0.880771	0.941094	0.856791	0.91042
SPAC4G9.09c	0.968212	0.777795	0.803332	0.990227	0.763386	0.77092
SPAC4G9.10	0.848627	1.05902	1.24792	1.14315	1.05534	0.923189
SPAC4G9.11c	1.06903	1.15037	1.07608	1.09665	1.07176	0.977308
SPAC4G9.12	1.41919	1.23896	0.873004	1.44944	1.38246	0.953787
SPAC4G9.13c	1.21739	1.3532	1.11156	0.974115	1.17674	1.20801
SPAC4G9.14	1.29015	1.25138	0.969947	1.03649	1.39069	1.34173
SPAC4G9.16c	1.03368	0.876708	0.848146	0.908479	0.708492	0.779866
SPAC4G9.19	1.18889	1.04501	0.878981	1.06109	1.13518	1.06983
SPAC4G9.20c	1.21063	1.14994	0.949866	1.19141	1.35073	1.13372
SPAC4H3.01	1.47134	1.4785	1.00487	1.11236	1.47809	1.3288
SPAC4H3.02c	0.979338	0.880694	0.899276	0.943166	0.770525	0.816956
SPAC4H3.03c	1.60848	1.46751	0.912357	1.32657	1.67891	1.2656
SPAC4H3.04c	0.967848	1.1326	1.17022	0.986828	1.03187	1.04564
SPAC4H3.05	1.00096	1.00271	1.00175	1.01896	0.94748	0.929851
SPAC4H3.06	0.878463	1.02855	1.17085	0.9831	1.02322	1.04081
SPAC4H3.07c	1.17671	1.4198	1.20658	1.16546	1.55054	1.33041
SPAC4H3.13	0	0	#DIV/0!	0	0	#DIV/0!
SPAC4H3.14c	1.07356	0.838531	0.781076	1.00015	0.990111	0.989959
SPAC513.01c	0.844936	0.988682	1.17013	0.878423	0.889178	1.01224
SPAC513.02	1.67678	1.44749	0.863252	1.13872	1.35415	1.18919
SPAC513.03	1.01979	0.595728	0.584166	1.08426	0.713134	0.657714
SPAC513.04	0	0	#DIV/0!	0	0	#DIV/0!
SPAC513.05	0.700526	1.01356	1.44686	0.977736	0.978072	1.00034
SPAC513.06c	1.03291	0.893345	0.864882	1.00695	0.890121	0.883978
SPAC513.07	0.936017	1.10228	1.17762	0.929841	1.02236	1.0995
SPAC521.02	1.16788	1.14878	0.983643	1.02139	1.05607	1.03395
SPAC521.03	0.959347	1.01342	1.05636	1.02742	0.938213	0.913177
SPAC521.04c	0.976486	1.0816	1.10764	1.05348	1.04545	0.992382
SPAC521.05	0.928049	0.95624	1.03038	0.756337	0.900044	1.19
SPAC56E4.03	0.952971	1.17143	1.22924	1.053	1.06453	1.01095
SPAC56E4.06c	1.20365	1.26454	1.05059	1.07314	1.16857	1.08893
SPAC56E4.07	1.05392	1.04368	0.990285	1.13	1.06327	0.940943
SPAC56F8.02	1.2343	1.06133	0.859857	1.043	1.15179	1.10431
SPAC56F8.04c	0	0	#DIV/0!	0	0	#DIV/0!
SPAC56F8.05c	1.02201	1.13871	1.11419	1.03737	1.0366	0.999255
SPAC56F8.06c	1.25367	1.36928	1.09222	1.11419	1.06165	0.952848
SPAC56F8.09	0.979193	1.299	1.32661	0.989619	1.08001	1.09134
SPAC56F8.12	0.849908	0.940977	1.10715	1.0154	0.963801	0.949181
SPAC56F8.14c	1.12729	1.2365	1.09687	1.07586	1.12131	1.04224
SPAC56F8.16	1.13366	1.18658	1.04667	0.97497	1.00341	1.02917
SPAC57A10.02	1.08082	0.829422	0.7674	0.996269	0.694974	0.697577
SPAC57A10.03	1.04418	1.06592	1.02082	0.97861	1.13635	1.16119
SPAC57A10.04	1.3134	1.3488	1.02695	1.50782	1.42431	0.944615
SPAC57A10.06	1.29527	1.04343	0.805571	1.12605	1.14177	1.01396
SPAC57A10.07	1.00117	1.03118	1.02997	0.841583	1.10835	1.31698
SPAC57A10.08c	1.15996	0.98704	0.850928	1.08859	1.00087	0.919412
SPAC57A10.09c	1.05283	0.905161	0.859736	0.999773	0.978467	0.978689
SPAC57A10.10c	1.09257	1.05425	0.964923	1.07733	1.11377	1.03383
SPAC57A10.12c	1.09762	1.00956	0.919773	1.01654	1.0357	1.01885
SPAC57A10.14	1.20245	1.10942	0.922633	1.02322	0.969082	0.947091
SPAC57A7.04c	0.866776	0.553005	0.638002	1.05266	0.655484	0.622691
SPAC57A7.05	0.982614	1.0936	1.11295	0.974678	1.06201	1.0896
SPAC57A7.07c	1.0194	0.851855	0.835643	1.06142	0.957823	0.902399
SPAC57A7.08	1.27272	1.02134	0.802492	1.08209	0.959714	0.886906
SPAC57A7.09	1.12373	0.801214	0.712997	0.839573	0.933806	1.11224
SPAC57A7.12	0.606384	0.576711	0.951065	0.631802	0.687967	1.0889
SPAC57A7.13	0.980111	0.947278	0.966501	1.08165	0.9777	0.903899
SPAC589.02c	1.20742	1.28528	1.06449	1.34581	1.57658	1.17147
SPAC589.03c	0.945362	0.954011	1.00915	1.05407	1.00177	0.950391
SPAC589.05c	0.924636	0.934693	1.01088	0.956398	0.902941	0.944106
SPAC589.07c	0.856927	0.746553	0.871198	0.828458	0.93348	1.12677
SPAC589.08c	0.918481	1.05517	1.14882	1.09395	1.0127	0.925733
SPAC589.09	0.929029	0.796825	0.857696	1.09232	0.890289	0.815041
SPAC589.10c	0.994873	0.949867	0.954762	0.97209	0.905627	0.931629
SPAC589.11	0.996189	0.977645	0.981385	0.976469	0.952011	0.974952
SPAC589.12	1.15621	1.01202	0.875291	1.04431	1.04699	1.00257
SPAC5D6.01	1.02638	0.827767	0.806491	0.975066	0.961874	0.98647
SPAC5D6.02c	1.24289	0.805034	0.647713	1.03569	1.06804	1.03124
SPAC5D6.04	1.38114	1.3655	0.988674	1.21648	1.32045	1.08547
SPAC5D6.05	1.11083	0.849592	0.764828	1.18666	0.671424	0.565812
SPAC5D6.06c	0.973246	0.61135	0.628156	1.10292	0.646853	0.586492
SPAC5D6.07c	1.14938	0.880911	0.766423	0.948844	0.984363	1.03743
SPAC5D6.08c	1.08931	1.01023	0.927405	1.07605	1.08517	1.00847
SPAC5D6.09c	1.36834	1.15684	0.845434	1.04626	1.18435	1.13199
SPAC5D6.10c	1.4687	1.46515	0.997583	1.10852	1.47425	1.32993
SPAC5D6.12	0	0	#DIV/0!	0	0	#DIV/0!
SPAC5D6.13	0.920006	1.32653	1.44187	0.760016	1.21976	1.60492
SPAC5H10.01	1.04038	0.898307	0.863442	0.975953	0.977094	1.00117
SPAC5H10.02c	0.947611	0.989421	1.04412	1.06134	1.03057	0.971008
SPAC5H10.04	0.910148	1.03835	1.14086	0.938913	0.909532	0.968708
SPAC5H10.05c	0.968122	0.969187	1.0011	0.880992	1.03947	1.17989
SPAC5H10.06c	1.22379	1.54985	1.26644	1.29703	1.62443	1.25243
SPAC5H10.07	1.05419	1.0271	0.974302	1.03009	1.02663	0.996634
SPAC5H10.08c	1.03258	1.20003	1.16217	1.06548	0.962235	0.9031
SPAC5H10.09c	1.08425	0.822985	0.759034	0.95834	0.932973	0.97353
SPAC5H10.10	0.952848	0.98662	1.03544	0.969027	0.864525	0.892158
SPAC5H10.11	1.53499	1.47614	0.961663	1.09453	1.15579	1.05597
SPAC5H10.12c	1.05903	0.913852	0.862918	0.969061	1.02646	1.05923
SPAC5H10.13c	1.04408	0.952716	0.912493	0.974115	1.0246	1.05182
SPAC607.02c	0.924883	1.02681	1.11021	0.937733	0.968326	1.03262
SPAC607.06c	0.897291	1.10701	1.23372	0.989977	0.845581	0.854141
SPAC607.07c	0.898566	0.965321	1.07429	1.01127	0.929198	0.918843
SPAC607.08c	0.895304	1.01642	1.13528	0.845621	0.975979	1.15416
SPAC607.09c	1.17385	1.09955	0.936706	1.05993	0.988688	0.932785
SPAC607.10	1.08102	0.964058	0.891805	1.12963	1.1185	0.990145
SPAC630.04c	0.965654	0.871842	0.902851	0.997243	1.00025	1.00302
SPAC630.05	1.00982	1.04731	1.03713	1.03935	1.03498	0.9958
SPAC630.06c	1.0943	1.15279	1.05345	1.07299	1.08888	1.01481
SPAC630.07c	1.26955	0.958144	0.754708	0.923989	1.0844	1.17361
SPAC630.09c	0.994157	1.148	1.15475	1.03555	1.01647	0.981579
SPAC630.10	1.05842	1.1532	1.08954	1.18673	1.22563	1.03278
SPAC630.11	1.08886	0.956467	0.878413	1.04254	1.06259	1.01923
SPAC630.13c	1.06066	1.31507	1.23986	1.26056	1.42818	1.13297
SPAC630.14c	0.950984	0.870362	0.915223	0.81115	0.606542	0.747756
SPAC630.15	1.10724	0.928229	0.838325	1.03927	1.08782	1.04672
SPAC631.01c	0.993017	1.13135	1.13931	1.00818	1.07047	1.06179
SPAC631.02	0.775232	0.646066	0.833384	0.850849	0.495835	0.582753
SPAC637.03	1.05985	0.957898	0.903807	1.05223	1.0273	0.97631
SPAC637.06	0.783526	1.09902	1.40266	0.897609	0.941589	1.049
SPAC637.07	0.879863	1.00165	1.13841	0.795219	0.750068	0.943222
SPAC637.09	0.995714	0.789492	0.79289	0.747531	0.656846	0.878687
SPAC637.10c	0.944658	0.823548	0.871795	1.04285	0.931779	0.893493
SPAC637.11	0.903311	1.0857	1.20191	1.20598	1.50229	1.2457
SPAC637.13c	0.877616	1.00988	1.1507	0.988122	0.953085	0.964542
SPAC644.06c	1.00541	0.647536	0.644051	1.06166	0.797202	0.750904
SPAC644.07	0	0	#DIV/0!	0	0	#DIV/0!
SPAC644.08	1.32869	1.04766	0.788493	1.17379	1.13851	0.969942
SPAC644.09	1.20188	1.16451	0.968908	1.09344	1.0789	0.986705
SPAC644.11c	1.0593	0.954566	0.90113	1.03814	0.967966	0.932406
SPAC644.13c	0.994183	1.02277	1.02875	1.0071	0.907626	0.90123
SPAC644.14c	0.851076	0.845997	0.994033	0.712488	0.529205	0.742757
SPAC644.15	1.00612	1.15429	1.14727	0.964665	1.05737	1.0961
SPAC652.01	1.18651	0.897211	0.756174	1.08402	0.962235	0.887653
SPAC664.01c	1.1076	1.1449	1.03368	1.03853	0.923949	0.889667
SPAC664.02c	0.988029	1.16484	1.17896	0.945109	0.97057	1.02694
SPAC664.03	0.708687	0.600057	0.846717	0.80048	0.556187	0.694817
SPAC664.04c	1.35954	1.09931	0.808592	1.15573	1.2411	1.07387
SPAC664.07c	0.991523	1.0145	1.02317	0.973989	0.969573	0.995467
SPAC664.10	1.0917	0.996108	0.91244	1.07636	1.12841	1.04836
SPAC664.12c	0.89093	0.870732	0.977329	0.941032	0.935508	0.99413
SPAC664.13	1.68602	1.22757	0.728089	1.41192	1.41968	1.0055
SPAC664.14	1.40869	1.22329	0.868387	1.18151	1.44471	1.22277
SPAC664.15	1.07939	0.922792	0.854924	1.10723	0.986077	0.890577
SPAC683.02c	1.02948	1.07142	1.04073	0.959675	0.95432	0.99442
SPAC683.03	1.13938	0.911214	0.799747	1.08322	1.04552	0.965203
SPAC688.03c	0.932842	0.975132	1.04533	1.00828	0.986727	0.978629
SPAC688.04c	1.1279	1.03906	0.92123	1.34637	1.274	0.946246
SPAC688.06c	1.05166	1.06228	1.0101	0.995189	0.9094	0.913797
SPAC688.10	1.16636	1.30105	1.11548	1.22433	1.44756	1.18233
SPAC688.11	0	0	#DIV/0!	0	0	#DIV/0!
SPAC688.12c	0.880285	0.83341	0.94675	0.891612	0.704121	0.789716
SPAC688.13	1.05847	1.08214	1.02236	1.12169	1.05169	0.937594
SPAC688.14	1.05886	1.04249	0.984546	1.09673	1.02583	0.935355
SPAC694.02	0.93587	0.949763	1.01484	1.07314	0.816488	0.760843
SPAC694.03	1.00007	0.932211	0.932141	1.05828	1.02618	0.969662
SPAC694.04c	0.938396	0.644099	0.686383	0.964526	0.746478	0.773932
SPAC694.05c	0.955637	0.980392	1.0259	0.935299	0.903347	0.965837
SPAC694.06c	0.793501	0.890911	1.12276	1.02344	0.869409	0.849501
SPAC6B12.02c	0.70429	0.874456	1.24161	0.551746	0.449464	0.814622
SPAC6B12.03c	1.137	1.00665	0.885363	1.0466	1.0312	0.98528
SPAC6B12.04c	1.50249	1.66025	1.10499	1.04954	1.20727	1.15028
SPAC6B12.05c	0.847143	0.90792	1.07174	0.94486	1.02738	1.08734
SPAC6B12.06c	0.90352	0.908136	1.00511	1.02961	0.929249	0.902526
SPAC6B12.07c	1.01354	1.16697	1.15139	1.01966	0.95239	0.934026
SPAC6B12.08	0.873239	0.816459	0.934977	1.04431	0.973895	0.932573
SPAC6B12.09	1.27511	1.69205	1.32699	1.39424	1.14479	0.821084
SPAC6B12.12	0.783986	0.681225	0.868925	0.694134	0.790466	1.13878
SPAC6B12.14c	0.963365	0.767547	0.796735	0.694047	0.943908	1.36
SPAC6B12.15	0.949107	0.718255	0.756769	0.936107	0.744499	0.795314
SPAC6B12.16	1.11193	0.992667	0.892742	1.21547	1.09437	0.900372
SPAC6C3.02c	0.993171	0.850362	0.856209	1.08052	1.00052	0.925966
SPAC6C3.03c	0.937701	1.01154	1.07874	1.12291	1.00988	0.899343
SPAC6C3.04	1.00967	0.93019	0.921277	1.0576	1.08493	1.02584
SPAC6C3.05	1.04745	1.01471	0.968743	1.06182	0.962392	0.906362
SPAC6C3.06c	0.918763	0.89479	0.973907	0.888804	1.05012	1.1815
SPAC6C3.07	0.960095	0.801766	0.83509	1.09689	1.00541	0.916595
SPAC6C3.08	0.926749	1.08121	1.16667	0.977509	0.935109	0.956625
SPAC6F12.02	0.937262	0.991896	1.05829	1.12115	0.996065	0.88843
SPAC6F12.03c	0.814	0.710514	0.872867	0.771349	0.795392	1.03117
SPAC6F12.04	1.43916	0.785776	0.545995	1.13906	1.33975	1.17618
SPAC6F12.06	0.87674	0.98645	1.12513	0.948841	0.915886	0.965268
SPAC6F12.09	0.801767	1.04036	1.29759	0.843504	0.770768	0.913769
SPAC6F12.12	1.00627	1.28177	1.27379	1.02265	1.03429	1.01138
SPAC6F6.01	1.25457	1.1467	0.914021	1.16343	1.17117	1.00665
SPAC6F6.02c	0.802632	1.27084	1.58334	1.1236	0.971346	0.864493
SPAC6F6.03c	1.03955	1.02882	0.989676	1.04124	1.02959	0.988804
SPAC6F6.04c	0.994949	1.0067	1.01181	0.979537	0.99715	1.01798
SPAC6F6.06c	0.894382	0.944483	1.05602	1.04104	0.962392	0.924451
SPAC6F6.09	0.625065	0.748122	1.19687	0.560231	0.747344	1.33399
SPAC6F6.11c	1.28567	1.17924	0.917218	1.13126	1.20024	1.06097
SPAC6F6.12	0.722086	0.905468	1.25396	0.643094	0.475694	0.739697
SPAC6F6.13c	1.18768	1.30583	1.09948	1.15291	1.45436	1.26147
SPAC6F6.17	1.21307	1.0592	0.873158	1.0986	1.20822	1.09978
SPAC6G10.02c	1.36901	1.24132	0.90673	1.24132	1.54394	1.24379
SPAC6G10.03c	0.909272	0.971647	1.0686	0.986318	0.923508	0.936319
SPAC6G10.06	1.37964	1.4806	1.07318	1.25726	1.56397	1.24395
SPAC6G10.08	0.640845	0.577218	0.900715	0.833972	0.826473	0.991008
SPAC6G10.10c	0.994443	1.16942	1.17595	0.99992	0.951465	0.951541
SPAC6G10.11c	0.803597	0.660657	0.822125	0.604795	0.730173	1.20731
SPAC6G10.12c	1.09444	1.02549	0.936998	0.999399	1.01258	1.01319
SPAC6G9.01c	1.22256	1.29887	1.06242	1.06482	1.07506	1.00961
SPAC6G9.03c	1.25169	1.39674	1.11589	1.01112	1.19132	1.17822
SPAC6G9.04	0.99943	1.26571	1.26643	1.06637	1.05229	0.986794
SPAC6G9.05	1.05088	1.14897	1.09334	1.05033	1.02169	0.972732
SPAC6G9.08	0.795194	0.92697	1.16572	0.829176	0.843328	1.01707
SPAC6G9.09c	1.22039	1.08354	0.887863	0.986131	0.980273	0.99406
SPAC6G9.10c	1.44623	1.20309	0.831883	1.18749	1.43702	1.21013
SPAC6G9.12	1.14668	1.11278	0.97044	1.11939	1.07442	0.959825
SPAC6G9.13c	0.912221	1.04515	1.14572	1.2144	1.24922	1.02867
SPAC6G9.14	1.0291	0.889122	0.863978	1.23455	1.08334	0.877521
SPAC6G9.15c	1.06928	0.879334	0.822358	1.07176	0.862513	0.804765
SPAC6G9.16c	0.92644	1.02755	1.10914	1.09172	1.06533	0.97582
SPAC732.02c	0.966203	1.12853	1.168	1.2374	0.975066	0.787994
SPAC750.05c	1.15506	0.439405	0.380417	0.989977	0.942114	0.951652
SPAC750.06c	0.98702	0.989169	1.00218	0.982559	0.935237	0.951838
SPAC750.08c	0.954338	0.883157	0.925413	0.995013	0.916351	0.920943
SPAC767.01c	1.18935	1.11751	0.939603	1.1619	1.17504	1.01131
SPAC7D4.02c	1.04503	1.08857	1.04166	1.03617	1.02691	0.991059
SPAC7D4.03c	1.16132	1.0943	0.942284	1.15005	1.04335	0.907215
SPAC7D4.04	1.18651	1.01264	0.853456	1.12767	0.966759	0.857304
SPAC7D4.05	0.92725	0.833778	0.899195	0.931094	1.04688	1.12435
SPAC7D4.06c	1.30797	1.01734	0.777796	1.07469	1.12028	1.04241
SPAC7D4.08	0.972133	1.00046	1.02914	0.95545	1.07559	1.12574
SPAC7D4.12c	1.05187	0.818701	0.778326	1.04215	0.752588	0.722148
SPAC7D4.13c	0.999123	1.11889	1.11987	0.994962	1.0592	1.06457
SPAC7D4.14c	0.968843	0.935737	0.965829	1.04694	1.26836	1.2115
SPAC806.03c	0.963691	1.02391	1.06249	0.846825	0.919469	1.08578
SPAC806.04c	0.969356	1.28657	1.32725	1.0654	1.08579	1.01914
SPAC806.07	1.29499	1.1189	0.864026	1.40986	1.35863	0.963663
SPAC806.08c	0.982186	1.17549	1.19681	1.00834	1.05355	1.04484
SPAC821.03c	1.52066	1.41701	0.931839	1.32431	1.4904	1.12541
SPAC821.04c	0.770693	0.97035	1.25906	1.07061	1.06568	0.995389
SPAC821.05	0.792361	0.412158	0.520164	0.779962	0.529565	0.678963
SPAC821.06	0.998432	1.08276	1.08446	0.975936	0.908649	0.931054
SPAC821.07c	1.40929	1.26087	0.89468	1.08871	1.00945	0.927201
SPAC821.09	1.2404	0.735107	0.592638	0.992182	0.990821	0.998629
SPAC821.10c	1.20287	1.454	1.20877	1.24418	1.12913	0.907533
SPAC821.11	1.03927	0.970103	0.93345	0.963136	0.756178	0.785121
SPAC823.02	0.968388	0.882795	0.911613	0.972417	1.04401	1.07362
SPAC823.03	1.02807	0.950344	0.924392	0.960365	0.836468	0.87099
SPAC823.05c	0	0.0105487	#DIV/0!	0	0	#DIV/0!
SPAC823.09c	0.962919	0.964769	1.00192	1.08131	0.972619	0.899482
SPAC823.10c	0.913643	0.982432	1.07529	0.990437	0.974243	0.983649
SPAC823.11	1.37394	1.01668	0.739977	1.09076	1.35654	1.24366
SPAC823.12	0	0	#DIV/0!	0	0	#DIV/0!
SPAC823.13c	1.09035	1.15942	1.06335	0.953759	0.944829	0.990637
SPAC823.14	1.05202	1.05566	1.00346	0.989619	0.928629	0.93837
SPAC823.15	1.07349	1.15794	1.07867	1.16935	1.14116	0.975892
SPAC823.16c	1.08969	1.23981	1.13776	1.08494	1.06052	0.977494
SPAC824.02	0.882998	0.502565	0.569157	0.70368	0.625686	0.889163
SPAC824.03c	0.996159	0.937895	0.941511	1.03073	0.971284	0.942325
SPAC824.04	0.97335	0.517085	0.531242	0.877005	0.694447	0.791839
SPAC824.05	1.13416	0.85252	0.751676	1.0192	0.885137	0.868464
SPAC824.07	1.00844	0.87121	0.863914	0.912732	1.07701	1.17999
SPAC824.08	1.01767	1.03359	1.01564	0.954074	0.944109	0.989556
SPAC824.09c	0.974131	1.05762	1.0857	1.2134	1.18198	0.9741
SPAC869.01	1.57738	1.47881	0.937512	1.27559	1.58059	1.23911
SPAC869.02c	1.03031	1.04904	1.01818	1.05319	1.11282	1.05663
SPAC869.03c	1.29175	0.337828	0.261528	1.22218	0.371404	0.303886
SPAC869.04	0.998717	0.99971	1.00099	0.984272	1.04401	1.06069
SPAC869.05c	1.01083	1.01481	1.00394	1.04105	0.96391	0.925901
SPAC869.06c	1.61582	1.32044	0.817194	1.23158	1.40242	1.13871
SPAC869.07c	1.28037	1.34615	1.05137	0.983587	1.0848	1.10291
SPAC869.08	1.1122	1.0864	0.976802	1.03325	1.02207	0.989174
SPAC869.09	0.987144	1.33787	1.35529	1.07934	1.06797	0.989459
SPAC869.10c	0.947967	0.956972	1.0095	0.996171	0.999746	1.00359
SPAC869.11	1.58993	1.20175	0.755853	1.13234	1.34697	1.18954
SPAC890.02c	1.50406	0.594571	0.395312	1.17975	0.901213	0.763902
SPAC890.03	0.992874	0.978995	0.986021	1.01416	0.96607	0.952585
SPAC890.05	0.924248	0.810216	0.876622	0.945168	0.848787	0.898028
SPAC890.06	0.896485	0.6969	0.777369	1.01656	1.04812	1.03104
SPAC890.07c	1.00351	0.913748	0.91055	0.947016	0.910091	0.961009
SPAC8C9.03	0	0.000193592	#DIV/0!	0	0.000180002	#DIV/0!
SPAC8C9.04	0.958808	0.985505	1.02784	1.01338	0.9111	0.899069
SPAC8C9.05	1.71759	1.38371	0.805614	1.30865	1.46724	1.12119
SPAC8C9.06c	0.845497	0.813531	0.962192	0.830718	0.871215	1.04875
SPAC8C9.07	0.42691	0	0	0.0280928	0	0
SPAC8C9.09c	0.88192	0.975623	1.10625	0.854096	1.09685	1.28423
SPAC8C9.10c	0.966784	0.413485	0.427691	0.719731	0.396187	0.550466
SPAC8C9.11	1.00983	1.00532	0.995534	0.988518	1.01467	1.02646
SPAC8C9.12c	1.40174	1.2781	0.911793	1.15508	1.06993	0.926283
SPAC8C9.14	1.03894	0.911033	0.87689	1.08088	1.13828	1.0531
SPAC8C9.16c	1.10456	1.23062	1.11413	1.01415	0.960385	0.946981
SPAC8C9.17c	0.981572	0.589989	0.601065	0.929281	0.543278	0.584622
SPAC8C9.19	0.799342	0.951579	1.19045	0.860838	0.810698	0.941754
SPAC8E11.01c	0.97994	0.677454	0.691322	0.919483	0.826488	0.898861
SPAC8E11.02c	0.833547	0.627238	0.752493	0.685278	0.612186	0.893339
SPAC8E11.03c	1.04133	1.00319	0.96338	1.02233	1.01809	0.995849
SPAC8E11.04c	1.06001	0.933659	0.880802	1.04239	1.03888	0.99664
SPAC8E11.05c	0.907417	1.01943	1.12344	0.960607	1.12256	1.16859
SPAC8E11.06	1.36432	1.348	0.988038	1.18748	1.27286	1.0719
SPAC8E11.07c	0.822061	0.379401	0.461524	0.836216	0.406866	0.486556
SPAC8E11.10	1.05775	0.989965	0.935917	0.985416	0.99694	1.0117
SPAC8F11.02c	0.979388	0.712897	0.7279	0.964039	0.708737	0.735175
SPAC8F11.03	1.05829	1.06263	1.0041	0.969487	1.03195	1.06443
SPAC8F11.05c	0.968567	0.91068	0.940235	0.960442	0.939832	0.978541
SPAC8F11.08c	1.03868	0.860306	0.828272	1.05638	0.99813	0.944857
SPAC8F11.09c	1.13562	0.977095	0.860409	0.867105	0.928135	1.07038
SPAC8F11.10c	1.16871	1.2044	1.03054	0.919283	1.17522	1.27841
SPAC9.02c	0.925466	0.937356	1.01285	0.959837	0.965352	1.00575
SPAC9.05	0.958102	0.944149	0.985437	1.02564	1.03393	1.00809
SPAC9.06c	1.07576	0.971784	0.903348	1.03897	1.0421	1.00301
SPAC9.07c	1.0602	0.751475	0.708807	1.03671	0.970931	0.936547
SPAC9.08c	1.1695	1.3984	1.19572	1.22547	1.26345	1.03099
SPAC9.10	1.0399	1.02449	0.985178	1.05112	1.05319	1.00197
SPAC9.11	1.0193	1.03308	1.01352	1.01735	0.98732	0.970479
SPAC9.12c	0.973538	0.866235	0.88978	1.00372	0.963801	0.960226
SPAC9.13c	0.419562	0.124168	0.295947	0.529227	0.0627383	0.118547
SPAC922.03	1.04589	1.01442	0.969915	1.0475	1.09513	1.04547
SPAC922.04	1.54096	1.39761	0.906975	1.26558	1.22306	0.966398
SPAC922.05c	0.985946	0.895531	0.908296	1.03063	0.998901	0.969212
SPAC922.06	1.45203	1.42187	0.979228	1.04134	1.29794	1.24641
SPAC922.07c	0.777142	0.900377	1.15857	1.03986	1.05202	1.01169
SPAC926.02	0.945511	0.931422	0.985099	0.987371	0.961887	0.974189
SPAC926.03	1.52525	1.29189	0.846998	1.26708	1.15756	0.913567
SPAC926.05c	0.999777	1.00874	1.00896	0.960896	1.14382	1.19037
SPAC926.06c	1.35563	1.34024	0.988645	1.17441	1.39062	1.1841
SPAC926.07c	0.999857	0.971639	0.971777	1.05411	0.99757	0.946367
SPAC926.09c	0.986746	0.935631	0.948198	1.07628	1.02745	0.954629
SPAC959.04c	0.856265	0.604336	0.705781	0.810563	0.535298	0.660403
SPAC959.05c	0.778182	0.834514	1.07239	0.969518	0.988214	1.01928
SPAC959.07	1.03042	1.12289	1.08974	1.26557	1.19091	0.941
SPAC959.08	1.00848	0.804462	0.797696	0.808157	0.752427	0.931041
SPAC977.05c	1.48667	1.25474	0.843997	1.32777	1.22509	0.922666
SPAC977.06	1.05542	1.03651	0.98208	0.978333	1.07174	1.09547
SPAC977.10	0.954617	0.925412	0.969407	1.08417	1.03985	0.959127
SPAC977.11	0.981078	0.924642	0.942475	0.96007	1.00731	1.0492
SPAC977.14c	1.4449	1.11526	0.771861	0.920657	1.07984	1.1729
SPAC977.15	0.830412	0.883554	1.064	0.972633	0.916569	0.942359
SPAC977.16c	1.33492	0.622592	0.466391	1.06357	1.34298	1.26271
SPAC977.17	1.48119	1.367	0.922903	1.23335	1.342	1.0881
SPAC9E9.03	1.1096	0.928546	0.836832	0.921501	1.03986	1.12844
SPAC9E9.05	0.914172	1.00812	1.10277	0.95745	0.949686	0.99189
SPAC9E9.08	1.1993	0.549912	0.458529	1.05801	0.747834	0.706827
SPAC9E9.09c	0	0	#DIV/0!	0	0	#DIV/0!
SPAC9E9.10c	0.909476	0.915054	1.00613	0.960896	0.969829	1.0093
SPAC9E9.11	0.80434	0.888235	1.1043	0.959685	0.935933	0.975249
SPAC9E9.12c	1.08132	1.03903	0.960882	1.02406	0.946966	0.92472
SPAC9E9.13	0.879357	0.932655	1.06061	1.02212	1.01532	0.993344
SPAC9E9.14	0.88088	0.862294	0.978901	1.01475	0.898538	0.885478
SPAC9E9.15	1.05705	0.90846	0.859431	0.992189	1.04055	1.04874
SPAC9G1.02	0.775688	0.770109	0.992809	0.945423	0.938349	0.992518
SPAC9G1.03c	0.839248	0.410028	0.488566	0.488518	0.309963	0.634496
SPAC9G1.04	1.06238	1.07046	1.00761	1.0656	1.06408	0.998573
SPAC9G1.05	1.43081	1.33172	0.930745	1.06747	1.15237	1.07953
SPAC9G1.06c	0.962781	1.06977	1.11112	1.08811	1.20772	1.10992
SPAC9G1.07	0.914239	0.715277	0.782375	1.01945	0.828839	0.813025
SPAC9G1.08c	0.960444	0.840936	0.87557	1.02313	0.962894	0.941128
SPAC9G1.10c	1.02864	1.00455	0.976576	1.03098	0.95293	0.924291
SPAC9G1.11c	0.432714	0.573517	1.3254	0.980855	0.494802	0.50446
SPAC9G1.12	0.877219	0.650366	0.741396	0.880319	0.692674	0.786844
SPACUNK12.02c	0.974063	1.04366	1.07145	0.969015	0.935649	0.965567
SPACUNK4.07c	1.07271	1.08406	1.01059	1.03943	1.01196	0.973568
SPACUNK4.08	1.12644	1.01278	0.899106	1.07309	0.966205	0.900399
SPACUNK4.09	1.14581	0.802073	0.700002	0.830449	1.20615	1.45241
SPACUNK4.10	1.52059	1.66953	1.09795	1.28188	1.37782	1.07484
SPACUNK4.11c	0.909648	0.930597	1.02303	0.890846	1.04653	1.17476
SPACUNK4.12c	0.931285	1.04916	1.12657	1.07789	1.09868	1.01929
SPACUNK4.13c	0.93473	0.948214	1.01443	0.903743	0.918549	1.01638
SPACUNK4.14	0.927751	1.0606	1.14319	0.930719	0.972964	1.04539
SPACUNK4.15	1.31996	1.31345	0.995071	1.15614	1.03376	0.894148
SPACUNK4.16c	0.968078	0.815604	0.842498	0.926235	0.98065	1.05875
SPACUNK4.17	1.18795	0.90188	0.759192	1.01007	1.00867	0.998609
SPACUNK4.19	0.872879	0.840438	0.962834	0.880162	0.914833	1.03939
SPAP11E10.01	0.792317	0.846049	1.06782	0.915693	0.903263	0.986425
SPAP11E10.02c	1.32678	1.20341	0.907016	1.36157	1.34761	0.989747
SPAP14E8.02	1.06872	1.12976	1.05712	1.02883	1.02906	1.00022
SPAP14E8.04	0.971498	0.962927	0.991178	1.08021	0.96607	0.894332
SPAP14E8.05c	1.15721	0.998305	0.862686	1.11176	1.08058	0.971952
SPAP27G11.02	1.33626	1.12816	0.844266	1.09665	1.17133	1.0681
SPAP27G11.05c	0	0	#DIV/0!	0	0	#DIV/0!
SPAP27G11.06c	0	0	#DIV/0!	0	0.000348068	#DIV/0!
SPAP27G11.07c	1.04823	0.873478	0.83329	0.883714	0.997564	1.12883
SPAP27G11.08c	0.860095	0.977408	1.1364	1.00227	0.986308	0.984077
SPAP27G11.10c	1.05193	0.921251	0.875774	0.96883	1.04647	1.08014
SPAP27G11.12	1.07513	0.99678	0.927127	0.961047	0.932211	0.969995
SPAP27G11.14c	0	0	#DIV/0!	0	0	#DIV/0!
SPAP27G11.15	1.02988	0.871629	0.846343	0.988101	1.05552	1.06823
SPAP27G11.16	0.759734	0.868676	1.14339	0.907745	0.90497	0.996943
SPAP32A8.02	0.846233	1.10854	1.30997	1.28289	1.39549	1.08777
SPAP32A8.03c	0.953399	0.906011	0.950296	1.00834	1.03069	1.02217
SPAP7G5.03	1.35825	1.40281	1.03281	1.10839	1.40487	1.26749
SPAP7G5.04c	0.906475	1.05517	1.16403	0.941108	1.0357	1.10051
SPAP7G5.05	1.47834	1.55128	1.04934	1.06875	1.13779	1.0646
SPAP8A3.02c	1.37252	1.30494	0.950762	1.16254	1.38963	1.19534
SPAP8A3.03	0.9724	0.987363	1.01539	1.09935	1.09833	0.999071
SPAP8A3.04c	1.11714	1.25961	1.12753	1.01927	0.922256	0.904818
SPAP8A3.05	1.02162	1.11296	1.0894	1.19352	1.06666	0.893707
SPAP8A3.07c	0	0	#DIV/0!	0	0	#DIV/0!
SPAP8A3.12c	1.16287	1.44764	1.24489	1.16322	1.25355	1.07766
SPAP8A3.13c	1.06053	1.0489	0.989035	0.985566	0.983852	0.998261
SPAP8A3.14c	0	0	#DIV/0!	0	0	#DIV/0!
SPAPB17E12.02	1.46671	1.13024	0.770596	1.25666	1.17375	0.934021
SPAPB17E12.03	1.34758	0.958096	0.710974	0.945925	1.41635	1.49732
SPAPB17E12.04c	0.994694	0.745226	0.749201	0.925822	0.673938	0.727934
SPAPB17E12.05	0.867798	0.528012	0.60845	0.772479	0.669196	0.866296
SPAPB17E12.08	0.61535	0.933478	1.51699	1.1549	0.647382	0.560552
SPAPB17E12.12c	0.843734	0.844058	1.00038	1.23064	1.23464	1.00325
SPAPB17E12.14c	0.980943	0.835008	0.851229	1.14446	1.13126	0.988466
SPAPB18E9.01	0	0	#DIV/0!	0	0	#DIV/0!
SPAPB18E9.04c	0.904118	0.880623	0.974013	1.0134	0.606032	0.598017
SPAPB1A10.03	0.96366	0.935631	0.970914	0.947153	0.883989	0.933311
SPAPB1A10.05	1.04161	0.983252	0.943971	0.956502	0.943961	0.986889
SPAPB1A10.07c	1.06224	1.08385	1.02034	1.2248	0.9452	0.77172
SPAPB1A10.08	0.967103	1.07253	1.10902	1.02152	0.930217	0.910624
SPAPB1A10.09	1.54626	0.505197	0.326722	1.34891	0.724856	0.537362
SPAPB1A10.10c	1.10366	1.0207	0.924826	1.01066	1.04138	1.03039
SPAPB1A10.12c	1.10199	0.673941	0.611569	1.04947	0.925038	0.881437
SPAPB1A10.13	1.0175	0.852982	0.838312	0.930287	1.00348	1.07868
SPAPB1A10.14	1.03983	1.29657	1.2469	0.85618	1.19415	1.39474
SPAPB1A10.15	1.37131	1.20259	0.876968	1.2411	1.26909	1.02255
SPAPB1A11.01	0.994025	1.04824	1.05454	1.12563	1.10494	0.981622
SPAPB1A11.02	0.98492	0.904762	0.918615	0.923425	1.03864	1.12476
SPAPB1A11.03	1.05392	1.04543	0.991949	1.30439	1.25951	0.965588
SPAPB1A11.04c	0.830839	0.801858	0.965119	0.942749	0.820808	0.870654
SPAPB1E7.02c	0.393228	0.0957004	0.243371	0.0443828	0	0
SPAPB1E7.04c	1.03099	0.975948	0.946609	0.996091	1.08499	1.08925
SPAPB1E7.05	0.94543	1.16614	1.23344	1.10961	1.1348	1.0227
SPAPB1E7.06c	0.747682	0.844855	1.12997	0.784544	0.648479	0.826568
SPAPB1E7.07	0.90068	0.973301	1.08063	0.875954	0.872724	0.996312
SPAPB1E7.08c	0.991656	1.10736	1.11668	1.04886	1.09043	1.03963
SPAPB1E7.11c	0	0	#DIV/0!	0	0	#DIV/0!
SPAPB1E7.12	0.984081	0.857268	0.871136	1.03694	0.993241	0.957853
SPAPB21F2.02	1.00572	1.03891	1.033	0.912336	1.10217	1.20808
SPAPB21F2.03	0.849712	0.655082	0.770946	1.00639	0.877845	0.872272
SPAPB24D3.01	0.766282	0.846191	1.10428	0.921516	0.792368	0.859852
SPAPB24D3.02c	1.01789	1.36115	1.33723	1.15669	1.09374	0.945578
SPAPB24D3.03	0.967823	1.00819	1.04171	0.995537	1.02224	1.02682
SPAPB24D3.04c	1.31379	0.547986	0.417103	1.10615	1.30225	1.17728
SPAPB24D3.07c	1.12834	0.916375	0.812141	1.02285	1.07904	1.05493
SPAPB24D3.08c	1.08919	1.28306	1.17799	1.01501	1.21004	1.19215
SPAPB24D3.09c	1.08725	1.11454	1.0251	1.0567	1.15789	1.09576
SPAPB24D3.10c	0.985773	1.10094	1.11683	0.982991	1.10077	1.11981
SPAPB2B4.02	1.10814	1.1887	1.0727	1.03475	0.822269	0.794653
SPAPB2B4.03	1.2413	1.51206	1.21813	1.07781	1.15015	1.06712
SPAPB2B4.04c	1.1771	0.536252	0.45557	1.07616	1.22305	1.1365
SPAPB2B4.06	1.81676	1.65553	0.911259	1.66012	1.48767	0.896122
SPAPB2B4.07	1.05235	0.934813	0.888306	0.902694	0.747651	0.828244
SPAPB2C8.01	1.04954	0.871934	0.83078	0.992933	1.00952	1.0167
SPAPB8E5.02c	1.56461	1.58367	1.01219	1.42715	1.4467	1.0137
SPAPB8E5.03	1.37946	1.07145	0.776721	1.04324	1.08423	1.03929
SPAPB8E5.04c	0.904957	1.07129	1.1838	1.07889	0.971378	0.90035
SPAPB8E5.05	0.83768	0.66557	0.794539	0.959578	0.673027	0.701377
SPAPB8E5.06c	1.37287	1.28805	0.938223	1.11947	1.23083	1.09948
SPAPB8E5.08	0.970647	0.944899	0.973473	1.06573	0.945503	0.887189
SPAPB8E5.10	1.19908	1.12961	0.942066	0.979805	0.924945	0.944009
SPAPJ691.02	1.09257	1.07274	0.981852	1.1122	1.0732	0.964935
SPAPJ691.03	1.54249	1.44665	0.937867	1.41452	1.40307	0.991905
SPAPJ695.01c	1.08526	1.2413	1.14378	1.0455	0.981548	0.938829
SPAPJ696.01c	0.971413	1.20218	1.23756	0.882371	0.990449	1.12249
SPAPJ696.02	1.25978	1.42133	1.12823	1.16709	1.08441	0.929152
SPAPJ698.02c	0.708776	0.668568	0.943271	0.813252	0.677537	0.83312
SPAPJ760.02c	1.00161	0.935838	0.934335	0.996082	0.951465	0.955208
SPAPJ760.03c	0.985346	1.15688	1.17409	0.975984	0.975113	0.999108
SPAPYUG7.02c	1.03483	0.830997	0.803024	0.979552	0.839368	0.856889
SPAPYUG7.03c	1.0253	1.01354	0.988531	1.04541	0.81608	0.780634
SPAPYUG7.04c	1.29705	1.08115	0.833549	0.949763	1.07159	1.12827
SPAPYUG7.06	1.02404	1.07582	1.05056	0.94766	0.939088	0.990954
SPAPYUK71.03c	1.43537	1.3929	0.970408	1.26282	1.13491	0.898713
SPBC106.01	0.827287	0.714748	0.863966	0.849405	0.66133	0.77858
SPBC106.02c	1.37438	0.911432	0.66316	1.30639	1.35289	1.0356
SPBC106.03	1.06142	1.04986	0.989109	0.996881	1.03122	1.03445
SPBC106.04	0.888206	0.998725	1.12443	0.848781	0.899927	1.06026
SPBC106.05c	1.3833	1.42203	1.02799	1.22861	1.38392	1.12641
SPBC106.07c	0	0	#DIV/0!	0	0	#DIV/0!
SPBC106.08c	0.926426	0.948191	1.02349	0.948089	1.00578	1.06085
SPBC106.10	0.822004	0.546511	0.664852	0.654923	0.584286	0.892144
SPBC106.11c	0.98649	0.889455	0.901636	0.986318	1.03077	1.04507
SPBC106.12c	1.05757	0.941826	0.890552	0.891161	0.97363	1.09254
SPBC106.16	0.930248	0.588554	0.632685	1.02152	0.600277	0.587633
SPBC106.17c	0.792431	0.797812	1.00679	0.640631	0.592934	0.925548
SPBC106.19	0.775232	0.0519274	0.066983	0.860322	0.483597	0.562112
SPBC106.20	1.5933	1.61236	1.01196	1.55746	1.85536	1.19127
SPBC1105.01	1.14405	1.07827	0.942506	0.99944	1.27608	1.2768
SPBC1105.02c	1.41112	1.25141	0.886822	1.14673	1.2376	1.07924
SPBC1105.04c	0	0	#DIV/0!	0.00345813	0	0
SPBC1105.05	0.982649	1.08283	1.10195	1.07127	1.07768	1.00599
SPBC1105.08	1.0543	0.886071	0.840438	0.889431	0.948969	1.06694
SPBC1105.09	1.46835	1.26437	0.86108	1.25744	1.46794	1.16741
SPBC1105.10	0.998575	0.82509	0.826267	0.614659	1.00729	1.63878
SPBC1105.11c	1.16745	0.771271	0.660646	0.90972	0.95581	1.05066
SPBC1105.12	0.986769	1.06642	1.08072	0.937295	1.01584	1.0838
SPBC1105.14	1.68667	1.44378	0.855997	1.19687	1.61282	1.34754
SPBC1105.18c	1.11253	1.0846	0.974896	0.972772	1.13209	1.16378
SPBC115.02c	0.959099	0.725196	0.756122	1.17946	1.15795	0.981765
SPBC115.03	1.05373	1.12262	1.06538	0.946524	1.02933	1.08748
SPBC119.03	1.34915	1.40298	1.0399	1.11441	1.33463	1.19761
SPBC119.04	1.12276	1.50123	1.33708	0.886239	1.45667	1.64366
SPBC119.06	0	0	#DIV/0!	0	0	#DIV/0!
SPBC119.08	1.16546	1.02157	0.876544	0.940507	1.01079	1.07473
SPBC119.12	0.867892	0.619882	0.714238	0.863165	0.712807	0.825807
SPBC119.14	0.925709	0.953761	1.0303	0.979448	0.9784	0.998929
SPBC119.16c	1.06794	1.11206	1.04131	0.919283	1.018	1.10739
SPBC1198.01	1.12196	1.28084	1.14161	1.04717	1.22272	1.16764
SPBC1198.03c	1.49038	1.49149	1.00075	1.13743	1.53833	1.35245
SPBC1198.06c	0.902517	1.05862	1.17296	1.01669	1.02839	1.01151
SPBC1198.07c	0.851076	0.70816	0.832076	0.830135	0.838448	1.01001
SPBC1198.08	0.899678	0.97874	1.08788	1.09252	1.02632	0.939406
SPBC1198.09	1.14251	1.12817	0.987451	1.17544	1.1486	0.977166
SPBC1198.11c	1.12946	0.88519	0.783726	1.02562	0.898886	0.87643
SPBC1198.12	0.974206	0.668861	0.68657	0.978138	1.14967	1.17537
SPBC1198.14c	0.983067	0.871657	0.886671	1.02114	0.971008	0.950909
SPBC11B10.02c	1.08079	0.92625	0.857009	1.02797	0.954615	0.928645
SPBC11B10.05c	1.12437	1.02979	0.915878	0.979853	0.942206	0.96158
SPBC11B10.06	1.25921	1.15766	0.919351	1.144	1.19046	1.04061
SPBC11B10.07c	1.00437	0.798503	0.795028	0.976996	0.871664	0.892188
SPBC11B10.08	0.870774	0.83341	0.957092	0.999622	0.888259	0.888595
SPBC11B10.10c	1.10203	1.02162	0.927033	0.896604	0.675233	0.7531
SPBC11C11.01	0.99948	1.0608	1.06136	1.09039	1.00027	0.91735
SPBC11C11.02	0.00107148	0.000875657	0.817238	0.000438949	0.000519931	1.18449
SPBC11C11.06c	1.11894	1.13669	1.01587	0.974232	1.17229	1.2033
SPBC11C11.07	1.01143	0.693275	0.685438	0.754402	0.799886	1.06029
SPBC11C11.08	1.07941	1.16541	1.07968	0.996561	0.991867	0.99529
SPBC11C11.09c	0.550007	0.608568	1.10647	0.53201	0.443091	0.832862
SPBC11C11.10	1.08681	1.1261	1.03614	1.05597	1.05008	0.994416
SPBC11C11.11c	1.19338	1.04126	0.872528	1.11201	1.28489	1.15546
SPBC11G11.01	0.834685	1.01556	1.2167	0.945032	1.01183	1.07069
SPBC11G11.02c	0.980936	0.86793	0.884798	0.96883	0.929516	0.959422
SPBC11G11.03	1.30996	1.53944	1.17518	1.12362	1.40185	1.24762
SPBC11G11.05	0.999858	0.823548	0.823665	0.979634	0.828054	0.845269
SPBC1215.01	1.22103	1.38593	1.13504	1.21988	1.52516	1.25025
SPBC1271.01c	0.951542	1.0762	1.13101	0.976678	1.00985	1.03397
SPBC1271.03c	0.952961	0.972496	1.0205	1.05211	1.01639	0.966049
SPBC1271.05c	1.31523	1.00765	0.766135	0.972476	0.864909	0.889389
SPBC1271.06c	1.10674	1.34246	1.21299	1.0363	1.24672	1.20305
SPBC1271.07c	1.06532	1.02364	0.960877	1.02746	1.12893	1.09876
SPBC1271.08c	0.989923	1.09725	1.10842	0.982233	1.0912	1.11094
SPBC1271.09	1.02252	0.541733	0.529804	1.04661	0.922998	0.881894
SPBC1271.10c	0.910319	0.820341	0.901157	0.956064	0.982982	1.02816
SPBC1271.11	0.911794	1.08029	1.1848	1.02883	1.05238	1.02289
SPBC1271.12	1.04765	0.744703	0.710835	0.81406	0.867213	1.06529
SPBC1271.14	0.864238	0.676649	0.782942	0.964817	0.832908	0.863281
SPBC1271.15c	0	0	#DIV/0!	0	0	#DIV/0!
SPBC1289.01c	1.06405	0.945371	0.888462	1.0954	0.938872	0.857103
SPBC1289.06c	1.66386	1.11646	0.671007	1.07074	1.41941	1.32563
SPBC1289.08	1.23833	0.935597	0.755532	1.16958	0.830388	0.709991
SPBC1289.09	1.1249	1.01323	0.900732	1.2734	1.07744	0.846112
SPBC1289.10c	0	0	#DIV/0!	0	0	#DIV/0!
SPBC1289.11	1.54373	1.44628	0.936874	1.30732	1.68745	1.29077
SPBC1289.13c	1.41071	1.40113	0.99321	1.09343	1.20937	1.10603
SPBC1289.14	1.0347	0.799618	0.7728	0.933995	0.895122	0.958379
SPBC1289.15	0.977614	1.03778	1.06154	0.971411	1.02435	1.05449
SPBC1289.16c	1.09285	0.989169	0.905129	1.05593	0.952745	0.902279
SPBC12C2.01c	1.12703	0.613676	0.544507	0.929392	0.523371	0.563132
SPBC12C2.02c	0.922759	0.696157	0.75443	0.671752	0.688687	1.02521
SPBC12C2.03c	1.48599	1.22329	0.823215	1.2295	1.25893	1.02394
SPBC12C2.04	0.935628	0.882206	0.942903	1.01899	0.949201	0.93151
SPBC12C2.05c	1.54183	1.71832	1.11447	1.16751	1.46449	1.25438
SPBC12C2.07c	0.958936	0.707875	0.738187	0.978098	0.887668	0.907545
SPBC12C2.08	0.939338	1.02421	1.09035	0.994888	1.09264	1.09825
SPBC12C2.09c	1.23073	1.26428	1.02726	1.03003	0.931856	0.90469
SPBC12C2.12c	1.1021	1.17328	1.06459	1.07839	1.05871	0.981747
SPBC12D12.02c	0.87011	1.02373	1.17656	0.939923	1.02628	1.09188
SPBC12D12.04c	1.31911	1.17846	0.893374	1.05993	0.710059	0.669911
SPBC12D12.05c	1.33177	1.30112	0.97699	1.21177	0.949008	0.78316
SPBC12D12.06	1.24612	1.30752	1.04928	0.923875	1.36279	1.47508
SPBC12D12.07c	0.890611	0.798742	0.896846	0.890684	0.761172	0.854593
SPBC12D12.09	1.15882	1.1267	0.972287	1.03431	1.02842	0.99431
SPBC1306.02	0.97903	1.05972	1.08242	1.03972	0.947314	0.91112
SPBC1347.01c	1.0329	1.00335	0.971392	0.962383	0.984122	1.02259
SPBC1347.02	1.33522	1.08984	0.816226	1.12166	1.26274	1.12577
SPBC1347.03	1.46373	1.40993	0.963245	1.10821	1.35595	1.22355
SPBC1347.06c	1.07071	1.15858	1.08207	0.966202	1.0047	1.03984
SPBC1347.07	0.984081	1.21681	1.2365	0.948277	1.0773	1.13606
SPBC1347.08c	1.39435	1.17711	0.844199	1.2248	1.22889	1.00334
SPBC1347.09	1.09894	0.913667	0.831407	0.974741	1.01445	1.04074
SPBC1347.11	0.849669	0.989237	1.16426	0.889645	0.868232	0.975931
SPBC1347.12	1.39233	1.35708	0.974681	1.20966	1.42345	1.17674
SPBC1347.13c	0.967378	1.14304	1.18159	1.06285	1.03057	0.969626
SPBC1348.01	1.40812	1.45534	1.03353	1.24622	1.46737	1.17746
SPBC1348.02	1.36032	1.18021	0.867595	1.19131	1.29497	1.08702
SPBC1348.07	1.08707	1.21097	1.11398	0.96445	1.14445	1.18663
SPBC1348.14c	1.3283	1.37967	1.03867	1.39832	1.28983	0.922418
SPBC13A2.02	1.18552	1.31407	1.10844	0.857435	1.10338	1.28683
SPBC13A2.04c	1.1491	0.975651	0.849059	1.06709	1.08649	1.01819
SPBC13E7.03c	1.11173	1.18543	1.0663	1.0551	0.956712	0.906752
SPBC13E7.04	0	0	#DIV/0!	0	0.00363951	#DIV/0!
SPBC13E7.06	0.881881	1.03414	1.17266	0.857099	0.873975	1.01969
SPBC13E7.07	1.23178	1.32886	1.07881	1.11126	1.19202	1.07268
SPBC13E7.08c	1.14255	1.2908	1.12975	0.824878	0.634006	0.768606
SPBC13E7.09	1.27476	1.39444	1.09389	1.13872	1.44631	1.27012
SPBC13E7.11	1.059	0.699061	0.660115	0.951085	0.793088	0.833877
SPBC13G1.02	0.98406	1.04223	1.05912	0.994642	1.0585	1.06421
SPBC13G1.03c	1.24201	0.985175	0.793207	1.09931	1.19095	1.08336
SPBC13G1.04c	0.879691	1.09502	1.24478	1.04047	1.01923	0.979589
SPBC13G1.08c	0.999205	0.608155	0.608639	0.876259	0.539351	0.615515
SPBC13G1.10c	1.59028	1.26571	0.7959	1.1156	1.39681	1.25207
SPBC13G1.12	0.930389	0.72209	0.776116	0.939784	0.706603	0.751878
SPBC13G1.14c	1.05556	0.838674	0.794533	0.656184	0.824363	1.2563
SPBC146.02	0.867058	0.878668	1.01339	0.996748	1.05272	1.05616
SPBC146.04	1.22916	1.00939	0.821204	1.0173	1.03789	1.02024
SPBC146.06c	0.995232	1.00207	1.00687	1.06796	1.10743	1.03696
SPBC146.09c	0.996152	1.08508	1.08928	1.04939	1.10089	1.04908
SPBC146.10	1.32778	1.45384	1.09494	1.00416	1.2527	1.24751
SPBC146.11c	0.830497	1.07479	1.29415	0.916421	0.909171	0.992089
SPBC146.12	0	0	#DIV/0!	0	0.000325706	#DIV/0!
SPBC146.13c	0	0	#DIV/0!	0	0	#DIV/0!
SPBC14C8.03	1.06583	0.945843	0.887425	0.968426	1.06068	1.09527
SPBC14C8.04	1.3712	1.39995	1.02097	1.38694	1.2481	0.899896
SPBC14C8.05c	1.00371	0.995381	0.991703	1.02195	1.07445	1.05137
SPBC14C8.09c	0.800234	0.889694	1.11179	0.993683	0.966681	0.972827
SPBC14C8.11c	1.13747	1.00296	0.881745	1.08501	1.06218	0.97896
SPBC14C8.15	0.834455	0.933931	1.11921	0.87581	0.955662	1.09118
SPBC14C8.16c	0.932023	0.829109	0.88958	0.9839	0.666884	0.677796
SPBC14C8.17c	0.599301	0.449894	0.750698	0.390106	0.0397261	0.101834
SPBC14F5.03c	0.913113	0.954763	1.04561	0.99985	1.0425	1.04265
SPBC14F5.07	1.00371	1.15652	1.15225	1.10569	1.13869	1.02984
SPBC14F5.09c	0.968851	0.910668	0.939947	0.97481	0.829034	0.850457
SPBC14F5.10c	1.09377	0.776111	0.709573	0.901856	0.669247	0.742077
SPBC14F5.11c	1.0465	1.24302	1.18778	0.99928	0.973153	0.973853
SPBC14F5.12c	0.589061	0.500334	0.849375	0.484446	0.547092	1.12931
SPBC14F5.13c	1.04332	0.937567	0.898635	0.982856	0.791288	0.80509
SPBC1539.02	0.986253	0.838211	0.849895	0.97561	0.921906	0.944954
SPBC1539.03c	1.03101	0.745569	0.723142	0.974086	0.881831	0.905291
SPBC1539.04	1.68299	1.45954	0.867231	1.13015	1.47106	1.30165
SPBC1539.06	1.30573	1.13006	0.865459	1.25526	1.29514	1.03177
SPBC1539.07c	0.991537	0.995696	1.00419	1.10111	1.02337	0.929395
SPBC1539.08	1.81063	1.13983	0.629523	1.42403	1.08232	0.760041
SPBC1539.10	1.1056	0.988687	0.894256	1.05345	0.928111	0.881019
SPBC15C4.01c	1.03173	0.822161	0.796879	1.01774	0.886704	0.871249
SPBC15C4.04c	1.49839	1.14291	0.762755	1.21311	1.20139	0.990336
SPBC15C4.05	1.15006	1.38651	1.20559	1.04923	1.05355	1.00412
SPBC15C4.06c	1.18466	1.25913	1.06286	1.045	1.06655	1.02062
SPBC15D4.01c	1.07049	1.13624	1.06142	1.03814	0.90739	0.874049
SPBC15D4.02	0	0	#DIV/0!	0	0.000948407	#DIV/0!
SPBC15D4.03	1.03876	1.07327	1.03322	1.07833	1.03591	0.960665
SPBC15D4.05	1.05075	1.09245	1.03968	1.06679	1.0949	1.02636
SPBC15D4.06	1.05941	1.08136	1.02072	1.0762	1.14985	1.06843
SPBC15D4.07c	0.906623	1.10863	1.22282	0.925876	1.08584	1.17277
SPBC15D4.09c	0.83924	0.820024	0.977103	0.953898	0.883949	0.92667
SPBC15D4.10c	1.04623	0.762982	0.729271	0.74891	0.411185	0.549044
SPBC15D4.12c	1.3013	1.18997	0.91445	1.05269	1.10861	1.05313
SPBC15D4.13c	1.08094	1.0931	1.01124	1.03897	1.02728	0.988746
SPBC15D4.15	1.08665	1.00029	0.92053	0.99245	1.05247	1.06048
SPBC1604.01	1.04054	1.01722	0.977585	1.00647	1.05399	1.04721
SPBC1604.02c	0.936556	0.650207	0.694253	0.849045	0.539351	0.635244
SPBC1604.03c	0.73642	0.992549	1.3478	1.00023	1.0311	1.03087
SPBC1604.04	1.2134	1.18662	0.977931	0.794219	1.21772	1.53323
SPBC1604.07	0	0	#DIV/0!	0	0	#DIV/0!
SPBC1604.08c	0.87174	0.609234	0.698872	0.627556	0.800648	1.27582
SPBC1604.09c	1.04028	1.16427	1.11919	1.0254	1.11476	1.08714
SPBC1604.11	0	0	#DIV/0!	0.000150466	0	0
SPBC1604.12	0.867136	1.01033	1.16514	0.970664	1.02565	1.05665
SPBC1604.16c	0.882515	0.834698	0.945817	0.899781	1.08516	1.20602
SPBC1604.18c	1.02877	1.14237	1.11042	1.1161	0.942337	0.844314
SPBC1604.19c	0.907862	1.06552	1.17366	0.916341	0.987216	1.07735
SPBC1604.20c	1.10537	0.787823	0.712724	0.931077	0.944468	1.01438
SPBC1652.01	1.08266	0.902913	0.833978	1.00504	0.912983	0.908407
SPBC1652.02	0	0.000159286	#DIV/0!	0	0	#DIV/0!
SPBC1683.01	1.1444	1.30035	1.13627	1.01234	0.913679	0.902545
SPBC1683.02	1.08014	1.19268	1.10419	1.12803	1.14508	1.01512
SPBC1683.03c	0.941722	0.910162	0.966488	1.02346	0.987931	0.96529
SPBC1683.04	0.93404	0.923543	0.988761	0.952488	0.931328	0.977784
SPBC1683.06c	0.878502	1.15702	1.31704	1.02988	1.12167	1.08913
SPBC1683.07	1.22973	1.3123	1.06715	0.914841	1.31739	1.44002
SPBC1683.08	0.747515	0.722865	0.967024	0.85327	0.947849	1.11084
SPBC1683.09c	0.91518	1.01954	1.11404	0.982647	1.12899	1.14893
SPBC1683.10c	0.820242	1.07957	1.31616	1.02897	0.978644	0.951092
SPBC1683.11c	1.54124	1.6208	1.05162	1.24858	1.24571	0.997699
SPBC1683.12	0.86543	0.985027	1.13819	0.983311	0.959035	0.975312
SPBC1683.13c	0.924754	1.06437	1.15098	0.975149	1.13869	1.16771
SPBC1685.01	0.870742	0.755009	0.867087	0.940075	1.16821	1.24268
SPBC1685.02c	1.04112	1.14332	1.09817	0.965618	0.962757	0.997037
SPBC1685.04	0.877934	1.11188	1.26647	0.876852	0.995301	1.13508
SPBC1685.05	0.91673	1.10175	1.20183	0.904236	0.977643	1.08118
SPBC1685.06	0.928634	0.900944	0.970182	0.971451	0.975251	1.00391
SPBC1685.07c	1.41633	1.22754	0.866703	1.08531	1.17572	1.08331
SPBC1685.08	0.976385	0.805356	0.824834	0.910472	0.83674	0.919017
SPBC1685.11	1.02007	1.05659	1.03581	1.14324	1.03656	0.906684
SPBC1685.13	0.924238	1.09828	1.18831	1.00707	0.974333	0.967496
SPBC1685.14c	0.971391	1.04651	1.07733	0.962412	0.989801	1.02846
SPBC1685.15c	0.796424	0.522459	0.656007	0.930386	0.410845	0.441585
SPBC16A3.01	0.560819	1.04407	1.86169	0.991021	0.945179	0.953743
SPBC16A3.02c	1.12904	1.13363	1.00406	1.17185	1.20433	1.02772
SPBC16A3.03c	1.01483	0.740045	0.729227	1.09968	1.00204	0.911207
SPBC16A3.06	0.984901	1.15785	1.1756	1.13652	1.1829	1.04081
SPBC16A3.07c	0.918018	1.11304	1.21244	0.867695	0.969461	1.11728
SPBC16A3.08c	1.40012	1.27198	0.908477	1.16702	1.34922	1.15612
SPBC16A3.10	0.963878	0.986939	1.02392	1.08517	1.04784	0.965599
SPBC16A3.12c	0.987569	1.14863	1.16309	1.06997	1.02527	0.958224
SPBC16A3.13	1.65639	1.77941	1.07427	1.35315	1.5798	1.16749
SPBC16A3.14	1.2795	0.884427	0.691231	1.327	1.10878	0.835554
SPBC16A3.16	1.09965	0.937653	0.852685	1.10367	1.2201	1.1055
SPBC16A3.17c	1.13011	0.524054	0.463718	0.883139	0.581046	0.657932
SPBC16A3.18	1.30638	1.40376	1.07454	1.05142	1.23411	1.17375
SPBC16A3.19	0.806093	0.811723	1.00699	0.935047	0.705082	0.754061
SPBC16C6.01c	1.03	0.91944	0.892658	1.02992	0.900347	0.874189
SPBC16C6.02c	1.07468	0.967573	0.90034	1.03523	0.95905	0.926411
SPBC16C6.03c	0.965517	1.09559	1.13471	0.824169	0.988082	1.19888
SPBC16C6.04	1.09698	1.13458	1.03428	0.95545	0.939832	0.983654
SPBC16C6.05	0.935057	1.14454	1.22403	0.950912	1.04837	1.10249
SPBC16C6.06	1.0774	1.04288	0.967966	1.24029	1.10496	0.890884
SPBC16C6.08c	1.167	1.10438	0.946341	1.12181	1.10624	0.986121
SPBC16C6.09	0	0	#DIV/0!	0	0.00439523	#DIV/0!
SPBC16C6.10	1.24712	1.8519	1.48494	1.49573	1.50278	1.00472
SPBC16C6.11	0.664779	0.394396	0.593274	0.580145	0.0292894	0.0504864
SPBC16D10.01c	1.07097	1.15647	1.07984	1.02912	1.15481	1.12213
SPBC16D10.02	1.16929	1.14501	0.979231	0.932036	1.01993	1.0943
SPBC16D10.05	1.21078	1.20893	0.998477	1.01588	1.19307	1.17442
SPBC16D10.07c	1.09467	0.901823	0.823828	1.10247	1.16541	1.0571
SPBC16D10.08c	0.937295	1.14413	1.22067	0.970746	0.96481	0.993885
SPBC16D10.11c	1.08509	1.41864	1.3074	1.14227	1.45397	1.27287
SPBC16E9.02c	0.00109687	0	0	0	0	#DIV/0!
SPBC16E9.03c	1.0441	0.904762	0.866545	1.02372	1.02959	1.00573
SPBC16E9.06c	1.22226	1.32849	1.08691	1.08494	1.09225	1.00673
SPBC16E9.07	1.0301	0.659943	0.640662	0.985296	0.754459	0.765717
SPBC16E9.08	1.08804	1.13598	1.04406	1.28002	1.32383	1.03423
SPBC16E9.09c	0.857707	0.729908	0.850999	0.860456	0.792829	0.921406
SPBC16E9.11c	0.994437	1.10656	1.11275	1.08164	1.26007	1.16496
SPBC16E9.12c	1.06477	0.718541	0.674833	0.901669	0.922489	1.02309
SPBC16E9.13	1.33007	1.32272	0.994475	1.0882	1.31141	1.20512
SPBC16E9.14c	1.26917	1.73031	1.36334	1.41967	1.56526	1.10256
SPBC16E9.15	0.965399	1.21025	1.25362	1.02649	0.994689	0.969018
SPBC16E9.16c	1.28155	1.60133	1.24952	1.5004	1.54125	1.02722
SPBC16E9.17c	0.949536	0.890889	0.938236	1.02526	1.08278	1.0561
SPBC16E9.18	0	0	#DIV/0!	0	0	#DIV/0!
SPBC16E9.19	1.3487	1.69286	1.25518	1.48741	1.64601	1.10663
SPBC16G5.02c	1.04767	1.04967	1.00191	1.05302	1.01565	0.964516
SPBC16G5.03	1.104	1.02389	0.927435	1.04139	1.02419	0.983484
SPBC16G5.05c	0.896537	1.08954	1.21527	1.01526	0.862029	0.849075
SPBC16G5.06	1.07327	1.01993	0.9503	0.977369	0.985746	1.00857
SPBC16G5.07c	1.08503	1.02405	0.943798	1.05262	1.28064	1.21662
SPBC16G5.09	0.892438	0.987088	1.10606	0.937707	1.02581	1.09396
SPBC16G5.11c	0.850298	0.457268	0.537773	0.876728	0.908319	1.03603
SPBC16G5.13	0.924522	0.604608	0.653968	0.743299	0.781506	1.0514
SPBC16G5.15c	0.999431	0.799045	0.7995	0.944448	0.863383	0.914167
SPBC16G5.16	1.01525	1.1813	1.16356	1.0055	0.95743	0.952188
SPBC16G5.17	1.35022	1.26112	0.93401	1.19219	1.21958	1.02298
SPBC16H5.02	1.38313	1.64078	1.18628	1.43879	1.42534	0.990651
SPBC16H5.03c	0.593273	0.200174	0.337406	0.368512	0.0639006	0.173402
SPBC16H5.04	1.17942	1.26125	1.06938	1.13605	1.25137	1.10151
SPBC16H5.05c	1.1046	1.25777	1.13866	1.03476	0.99469	0.961277
SPBC16H5.06	1.16624	1.32155	1.13317	1.12758	1.22847	1.08947
SPBC16H5.07c	0.942752	0.774956	0.822015	0.927939	0.733795	0.79078
SPBC16H5.08c	0.926749	0.999322	1.07831	0.871658	0.820448	0.94125
SPBC16H5.11c	1.03734	1.11509	1.07495	1.08399	0.933309	0.860995
SPBC16H5.12c	0.973471	0.964585	0.990871	1.10839	1.23828	1.11719
SPBC16H5.13	0.785236	1.08644	1.38358	1.05662	1.01845	0.963874
SPBC16H5.14c	1.15329	1.04607	0.907032	1.21125	0.962951	0.795003
SPBC1703.03c	1.10627	1.12174	1.01398	1.05176	1.14184	1.08565
SPBC1703.04	0.793216	0.82025	1.03408	0.950456	0.935469	0.984232
SPBC1703.06	1.24156	1.25874	1.01384	1.11576	1.25875	1.12816
SPBC1703.07	0.869642	0.836601	0.962006	0.863226	0.869473	1.00724
SPBC1703.08c	0.915776	1.04625	1.14247	0.992676	0.92242	0.929226
SPBC1703.11	0.895449	1.12354	1.25472	0.985819	1.02731	1.04209
SPBC1703.12	1.03061	0.935201	0.907422	1.06533	1.03068	0.967471
SPBC1703.13c	0	0	#DIV/0!	0.000300933	0	0
SPBC1703.14c	1.01553	1.11606	1.09899	1.02957	1.00081	0.972067
SPBC1706.01	0.868742	1.05145	1.21031	0.951737	0.973313	1.02267
SPBC1706.03	0.955304	0.913835	0.956591	1.02363	1.02201	0.998418
SPBC1709.01	1.05551	0.87922	0.832981	0.864836	0.965884	1.11684
SPBC1709.04c	0.986769	0.655871	0.664665	0.814826	0.542811	0.666168
SPBC1709.05	0.557218	0.634595	1.13886	0.650991	0.493025	0.757345
SPBC1709.06	1.37786	2.33734	1.69635	1.4055	1.47163	1.04705
SPBC1709.09	0.751875	0.72627	0.965945	0.777379	0.540035	0.694686
SPBC1709.10c	1.40105	1.47619	1.05363	1.2979	1.40933	1.08585
SPBC1709.11c	0.892438	1.036	1.16086	0.910706	0.850985	0.934423
SPBC1709.12	1.13786	1.13746	0.999654	1.02548	0.972677	0.948512
SPBC1709.13c	1.49881	0.622013	0.415005	1.13637	1.16658	1.02659
SPBC1709.14	1.00014	1.36695	1.36676	1.01699	1.03573	1.01843
SPBC1709.16c	1.24753	1.42103	1.13907	1.33379	1.31644	0.986992
SPBC1709.18	0.905314	1.05476	1.16507	1.04161	1.01992	0.979175
SPBC1709.19c	0.985346	1.02235	1.03755	1.03482	1.00748	0.973583
SPBC1711.01c	1.32892	1.48914	1.12056	1.39631	1.39906	1.00197
SPBC1711.03	1.31398	0.744018	0.566232	0.970652	1.32978	1.36998
SPBC1711.04	0.979087	1.11851	1.1424	1.14786	1.06585	0.928554
SPBC1711.05	1.15841	0.586015	0.505878	1.04586	1.06527	1.01856
SPBC1711.06	0.94449	0.979119	1.03666	1.05227	1.09845	1.04389
SPBC1711.08	0.924832	0.861855	0.931905	1.26349	1.1157	0.883025
SPBC1711.09c	1.04927	0.970054	0.924503	1.07984	1.04454	0.967308
SPBC1711.11	1.44401	1.30144	0.901273	1.32078	1.44617	1.09494
SPBC1711.12	0.831686	0.828995	0.996764	1.03699	0.920868	0.888023
SPBC1711.13	1.00058	1.03461	1.034	1.02247	1.00516	0.983069
SPBC1711.14	1.38525	1.39488	1.00695	1.2124	1.12785	0.930255
SPBC1711.15c	1.04267	0.877364	0.841457	1.03506	1.05785	1.02202
SPBC1718.01	0.982501	0.529666	0.539099	0.942551	0.800209	0.848982
SPBC1718.02	0.975773	1.27906	1.31082	1.01164	0.97651	0.965275
SPBC1718.03	0.61129	0.0259319	0.0424217	0.645662	0.00367293	0.00568864
SPBC1718.07c	0.184737	0	0	0.00438696	0	0
SPBC1734.04	0	0.0106476	#DIV/0!	0.35766	0.145801	0.407654
SPBC1734.05c	0.883007	1.12709	1.27642	0.860456	0.873634	1.01531
SPBC1734.06	0.967534	1.1862	1.226	0.951939	0.971404	1.02045
SPBC1734.07c	1.02594	1.15478	1.12558	1.04483	1.01593	0.972344
SPBC1734.08	0.91537	0.976885	1.0672	0.899338	0.886247	0.985444
SPBC1734.09	1.22068	1.12098	0.918328	1.10756	1.06043	0.957448
SPBC1734.11	1.18901	0.928799	0.781155	0.99564	1.08465	1.0894
SPBC1734.12c	0.937438	0.971832	1.03669	0.886914	0.842768	0.950226
SPBC1734.13	0.877583	1.01946	1.16166	0.889273	0.858789	0.965719
SPBC1734.15	1.05747	0.777958	0.735676	1.09764	0.904066	0.823645
SPBC1773.01	0.870052	0.997928	1.14697	0.900843	0.905789	1.00549
SPBC1773.02c	0.997845	1.05013	1.0524	1.08524	1.04493	0.96285
SPBC1773.03c	1.0238	1.21247	1.18428	1.05945	1.06723	1.00734
SPBC1773.04	1.16117	0.850005	0.732024	1.04411	0.987068	0.945367
SPBC1773.05c	1.00171	1.11177	1.10987	1.01959	0.911121	0.893615
SPBC1773.06c	1.0849	1.11453	1.02731	1.02255	0.980962	0.959326
SPBC1773.08c	1.11455	0.962709	0.863762	1.06356	0.988758	0.929666
SPBC1773.09c	1.39066	1.29778	0.933212	1.28513	1.30087	1.01225
SPBC1773.12	0.849304	1.04846	1.2345	0.897081	0.884293	0.985745
SPBC1773.13	1.29791	1.45508	1.12109	1.36828	1.38601	1.01296
SPBC1773.14	0.914741	0.979502	1.0708	1.04118	1.09034	1.04721
SPBC1773.15	1.12633	0.987826	0.877027	1.103	1.10164	0.998763
SPBC1773.16c	0.962805	1.10386	1.14651	1.03036	1.02493	0.994735
SPBC1773.17c	0.921094	0.732858	0.795639	0.977332	1.09543	1.12083
SPBC1778.01c	0.482451	0	0	0	0	#DIV/0!
SPBC1778.02	0.748026	0.842597	1.12643	0.920272	0.8446	0.917772
SPBC1778.03c	0.741057	1.06689	1.43968	0.969173	0.897669	0.926222
SPBC1778.04	0.825807	1.02697	1.2436	1.14185	1.04246	0.912955
SPBC1778.05c	1.03782	1.33879	1.29	1.09538	1.10501	1.00879
SPBC1778.06c	0.846931	0.772504	0.912122	0.983832	0.809532	0.822836
SPBC1778.07	1.08508	0.939436	0.865779	0.960362	0.992865	1.03384
SPBC1778.09	1.22873	1.14432	0.931305	1.10805	1.09387	0.987201
SPBC1778.10c	0.911679	0.332049	0.364217	0.964957	0.465165	0.482057
SPBC17A3.02	1.08877	1.01859	0.935544	1.0938	0.992042	0.906966
SPBC17A3.03c	1.26647	1.37664	1.08699	1.42872	1.41246	0.988622
SPBC17A3.05c	0.739868	0.0143358	0.0193761	0.633288	0.000849907	0.00134205
SPBC17A3.06	0.982329	0.982286	0.999957	0.86631	0.926469	1.06944
SPBC17A3.08	1.14947	0.718635	0.62519	0.959525	1.27107	1.32469
SPBC17A3.09c	1.02075	0.586641	0.574717	1.12113	0.641479	0.572174
SPBC17A3.10	0.929457	1.12554	1.21097	0.850897	1.15489	1.35726
SPBC17D1.02	0.967786	1.01148	1.04515	0.918146	1.01702	1.10769
SPBC17D1.05	0.810178	0.924778	1.14145	1.01287	1.02178	1.00879
SPBC17D1.06	1.01311	1.15633	1.14136	1.04624	1.01863	0.97361
SPBC17D1.07c	1.0523	1.16097	1.10327	0.998427	0.99793	0.999502
SPBC17D11.01	1.36166	1.38736	1.01888	1.27597	1.28553	1.00749
SPBC17D11.02c	1.65002	1.62105	0.982442	1.53836	1.46798	0.954248
SPBC17D11.03c	1.0778	0.99954	0.927386	0.969972	1.14825	1.1838
SPBC17D11.04c	1.05914	1.01326	0.956681	0.990878	1.04959	1.05925
SPBC17D11.08	1.19505	1.3546	1.13351	0.930579	1.0764	1.1567
SPBC17F3.01c	1.05244	1.04617	0.99404	0.951557	1.08199	1.13707
SPBC17G9.02c	0.969128	1.08599	1.12059	0.973356	1.13609	1.16719
SPBC17G9.05	1.1066	1.08528	0.980733	1.03869	1.00837	0.970808
SPBC17G9.07	0.675953	0.519965	0.769233	0.629454	0.489081	0.776994
SPBC17G9.08c	0.97587	1.09257	1.11959	0.979448	0.946043	0.965894
SPBC17G9.09	1.02959	0.87055	0.84553	0.905176	0.965715	1.06688
SPBC17G9.10	1.24452	1.31109	1.05349	0.971451	1.25597	1.29288
SPBC17G9.12c	0.984324	1.10793	1.12557	0.978295	0.96895	0.990447
SPBC1815.01	1.27828	1.02732	0.803674	1.05655	1.07608	1.01849
SPBC1861.01c	0.669536	0.624721	0.933065	0.883175	0.477477	0.540637
SPBC1861.02	1.14938	1.43333	1.24705	1.04717	1.16575	1.11324
SPBC1861.03	1.02822	0.998742	0.971333	0.979868	0.97849	0.998594
SPBC1861.05	0.794734	0.741681	0.933244	0.697052	0.484575	0.695179
SPBC1861.06c	1.64174	1.27066	0.773972	1.22791	1.3867	1.12932
SPBC1861.07	1.19838	0.914536	0.763145	0.999342	0.968631	0.969269
SPBC1861.09	1.38637	1.19249	0.860151	1.32107	1.48019	1.12045
SPBC18A7.01	1.41369	1.41385	1.00012	1.11429	1.11635	1.00185
SPBC18A7.02c	0.977086	1.12854	1.15501	1.12224	1.05354	0.938789
SPBC18E5.01	0.841474	0.962723	1.14409	0.769132	0.877656	1.1411
SPBC18E5.04	0	0	#DIV/0!	0	0	#DIV/0!
SPBC18E5.05c	0.809429	0.645884	0.797951	0.790987	0.706759	0.893516
SPBC18E5.07	1.15629	0.947913	0.819788	0.980905	1.02618	1.04615
SPBC18E5.08	1.07822	1.15777	1.07378	1.09389	1.17099	1.07048
SPBC18E5.10	0.806815	0.591286	0.732865	0.8507	0.910538	1.07034
SPBC18E5.11c	1.13828	1.06817	0.938413	1.00827	1.07666	1.06783
SPBC18E5.14c	1.0491	1.08625	1.03541	1.03101	1.00379	0.973601
SPBC18H10.02	1.42147	1.12899	0.794244	1.17281	0.92453	0.788303
SPBC18H10.04c	1.16555	0.746496	0.640469	0.971291	0.704679	0.725507
SPBC18H10.05	1.00841	1.00184	0.993486	1.00708	1.01755	1.0104
SPBC18H10.06c	0.84167	0.706224	0.839074	1.0442	0.772568	0.739868
SPBC18H10.07	0.988715	0.984523	0.99576	0.953561	0.866654	0.908861
SPBC18H10.08c	0.8895	0.908104	1.02092	0.94713	0.941604	0.994166
SPBC18H10.09	1.31668	1.07221	0.814331	1.26061	1.22922	0.975098
SPBC18H10.10c	1.0457	1.05381	1.00776	1.07102	1.08321	1.01138
SPBC18H10.11c	0.841347	0.883635	1.05026	0.880115	0.831015	0.944211
SPBC18H10.13	1.01864	1.13546	1.11469	1.1157	1.18343	1.06071
SPBC18H10.14	1.18858	0.828897	0.697383	0.776794	0.912825	1.17512
SPBC18H10.15	0.970124	1.00909	1.04017	1.09147	1.059	0.970252
SPBC18H10.16	1.04805	0.982783	0.937727	1.10006	1.01083	0.918886
SPBC18H10.18c	0.884001	0.965505	1.0922	1.06074	1.08675	1.02453
SPBC18H10.19	1.06201	0.56135	0.528575	0.819352	0.632794	0.77231
SPBC18H10.20c	1.08535	0.927362	0.854436	1.02389	1.03592	1.01175
SPBC1921.01c	0.876426	0.935266	1.06714	1.00504	0.99519	0.990202
[truncated: 1,422 more rows]
